# Supplementary material
Source: PubMed Central journal article supplement (PMC5141279)
Supplement: 10.1074_M114.047514_mcp.M114.047514-1.pdf [file 10.1074_M114.047514_mcp.M114.047514-1.pdf]

**Supplemental Materials for**

**Instant integrated ultradeep quantitative-structural membrane proteomics discovered PTM signatures for human Cys-loop receptor subunit bias**

by Xi Zhang, Ph.D.

1. Pdf of Supplemental Figures and Notes

**Supplemental Fig. S1.** PSM distribution against the sequences of GABA<sub>A</sub>R subunits and HPLC MS chromatography from three runs, supplementing **Fig. 3A**.

**Supplemental Fig. S2.** Ox-TMT2 PSM distribution against the sequences of GABA<sub>A</sub>R subunits, HPLC MS chromatography from three samples that combined multiple independent digestions, and representative MS and HCD MS/MS spectra, supplementing **Fig. 3G**.

**Supplemental Fig. S3.** HCD MS/MS spectra for selected Cys-PTM identifications (peptide FDR<1% by PD1.3 SEQUEST) discussed in **Fig. 2**. More annotated MS/MS spectra for tentative PTM identifications are shown in supplemental Data 1 and Data 2.

**Supplemental Fig. S4.** Bases for Cys-loop hLGIC PTM signature modeling, supplementing **Fig. 5**.

**Supplemental Fig. S5.** ECD sequence alignment of hGABA<sub>A</sub>R subunits with 3RHW and 2QC1, and sequence details of the four major mid-ECD NXS/T coding regions (A1, B, C1/C2) across Cys-loop hLGICs, supplementing **Fig. 5A** and **5E**.

**Supplemental Fig. S6.** Sequence alignments of ICL2 of human Cl<sup>-</sup> and cation channels showed high diversity in sequence and in K/R and D/E distribution, supplementing **Fig. 5A**.

**Supplemental Fig. S7.** Applicability to direct Ox-TMT structural mapping of GABA<sub>A</sub>R.

**Supplemental Note 1.** Calculation of column-residence time.

**Supplemental Note 2.** A catalytic site-occupancy model for digestion to overcome bias and enhance efficiency.

2. Excel of all Supplemental Tables

<Please see excel for all Supplemental Tables>

**Supplemental Table S1.** Peptides identified in a representative direct analysis of deglycosylated GABA<sub>A</sub>R digest (Expt. 6 in **Fig.2A**), supplementing **Fig. 2A** and **Fig. 4A**.

**Supplemental Table S2.** Full list of proteins identified in GABA<sub>A</sub>R digest by searching against the human proteome and filtered with CRAPome (version 1.1, 411 entries), supplementing **Fig. 2C**.

**Supplemental Table S3.** Peptides for PTM label-free peptide-centric quantitation of % site occupancy (N-glycosylation/deamidation and Mox), supplementing **Fig. 4BCDE**.

**Supplemental Table S4.** Peptides for representative K-Me1/Me2/Me3/Ac screening, supplementing **Fig. 5A**.

**Supplemental Table S5.** Basal oxidation (ox, diox) screening for multiple residues, using raw data of Expt. 4-6 in **Fig. 2A**.

**Supplemental Table S6.** Peptides for identification of H<sub>2</sub>O<sub>2</sub>-oxidized residues (ox, diox) in the apo7'/apo 4' Ox-TMT2 sample, for supplemental **Fig. S7A**.

**Supplemental Table S7.** MS/MS TMT2 127/126 ratios for peptides identified in H<sub>2</sub>O<sub>2</sub>-oxidized GABA 7'/apo 7' sample, for supplemental **Fig. S7B**.

3. Excel of Supplemental Data: Annotated MS/MS Spectra for PTM Identification

<Please see excel for all supplemental Data>

**Supplemental Data 1.** Representative annotated MS/MS spectra for N-deamidation, Mox and C-Cb PTM-bearing peptides shown in **supplemental Table S3**. These PTMs were identified by searching for dynamic Mox, C-Cb, deglyco and STY-P against the overexpressed GABA<sub>A</sub>R sequences (SEQUEST-HT PD1.4, peptide FDR<1% "high", using spectra of Expt. 4-6 in **Fig. 2A**). Both modified and non-modified N- and M-peptides are shown.

**Supplemental Data 2.** Representative annotated MS/MS spectra for K-PTM peptides shown in **supplemental Table S4**. Representative peptide K-Me1/Me2/Me3/Ac screening was done by searching for dynamic CK-Cb, KRC-Me, KR-Me2, KR-Me3, KC-Ac and deglyco against the overexpressed GABA<sub>A</sub>R sequence (SEQUEST-HT PD1.4, peptide FDR<1% "high", using raw data of Expt. 4-6 in **Fig. 2A**). Both modified and non-modified K-peptides are shown.

Supplemental Figure S1.

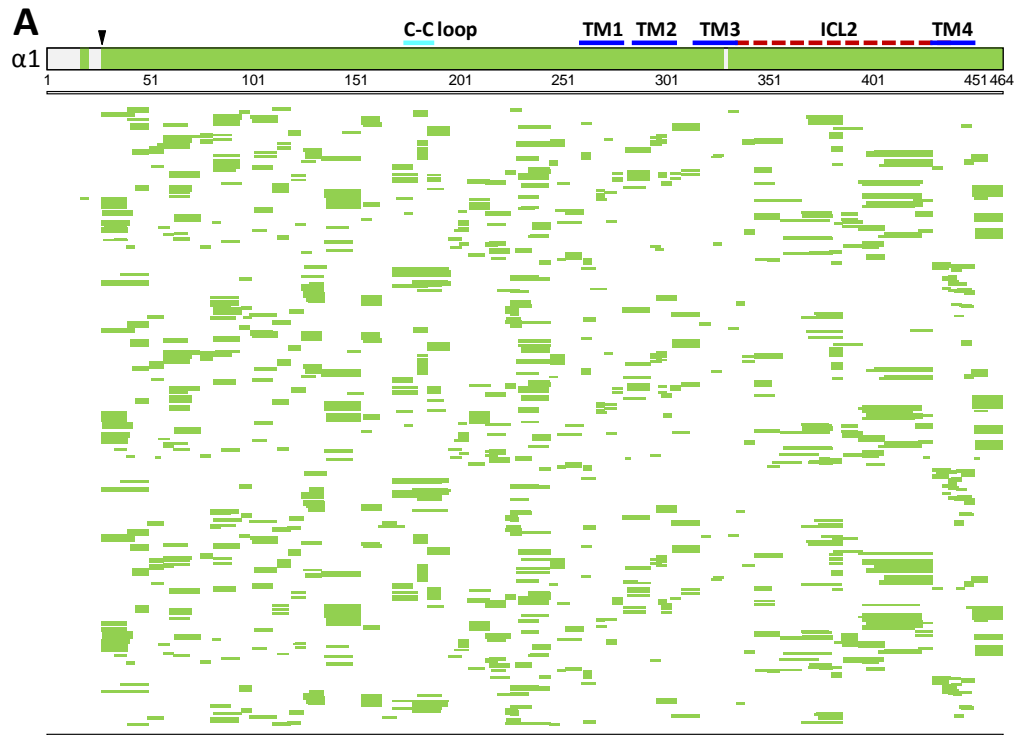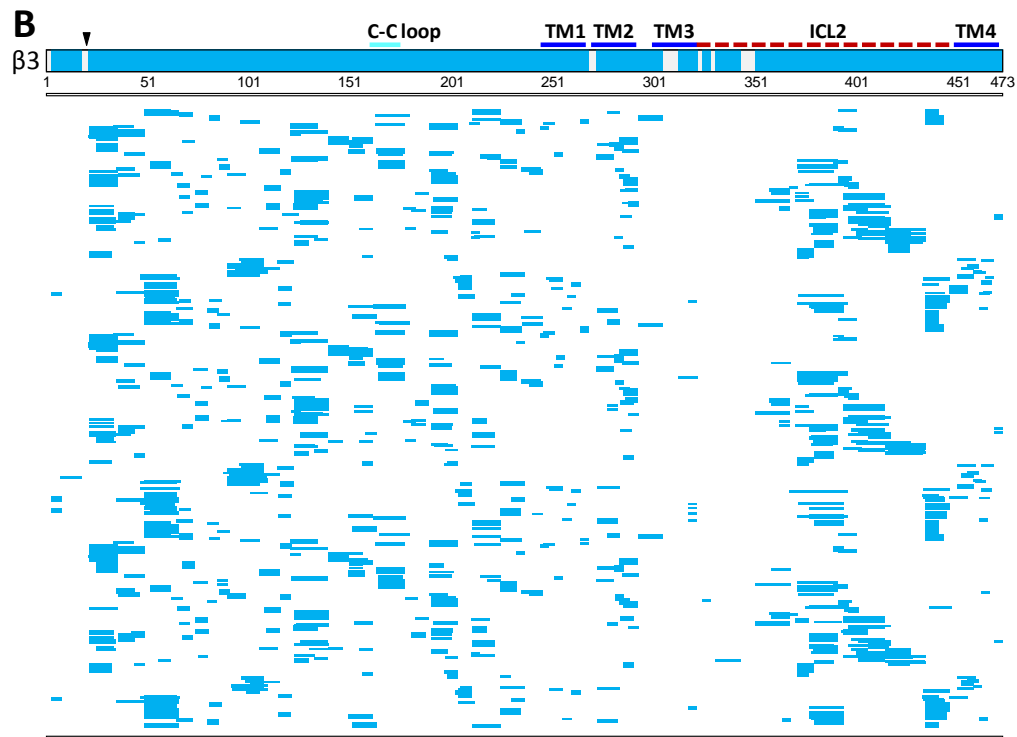

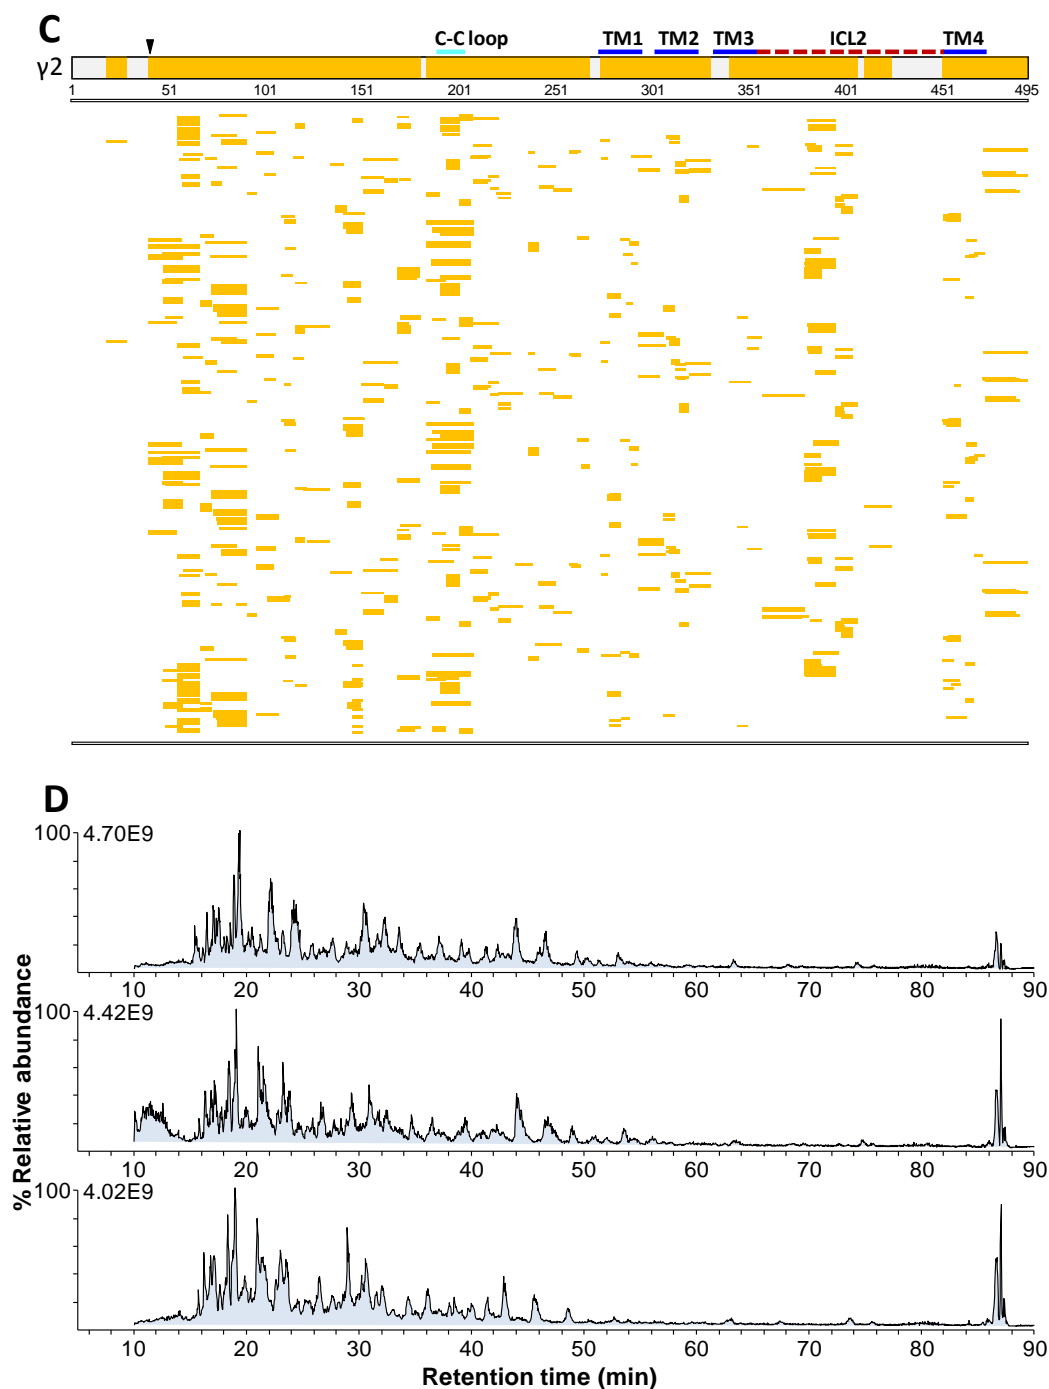

**Supplemental Figure S1.** PSM distribution against the sequences of GABA<sub>A</sub>R subunits (ABC) supplementing Fig. 3A, and HPLC MS chromatography in total ion counts from runs 4, 5 and 6 in Fig. 2 (D). Peptides were identified at FDR<1% by PD1.3 SEQUEST using b and y ions, and showed high coverage and basal level of run-to-run peptide reproducibility.

Supplemental Figure S2.

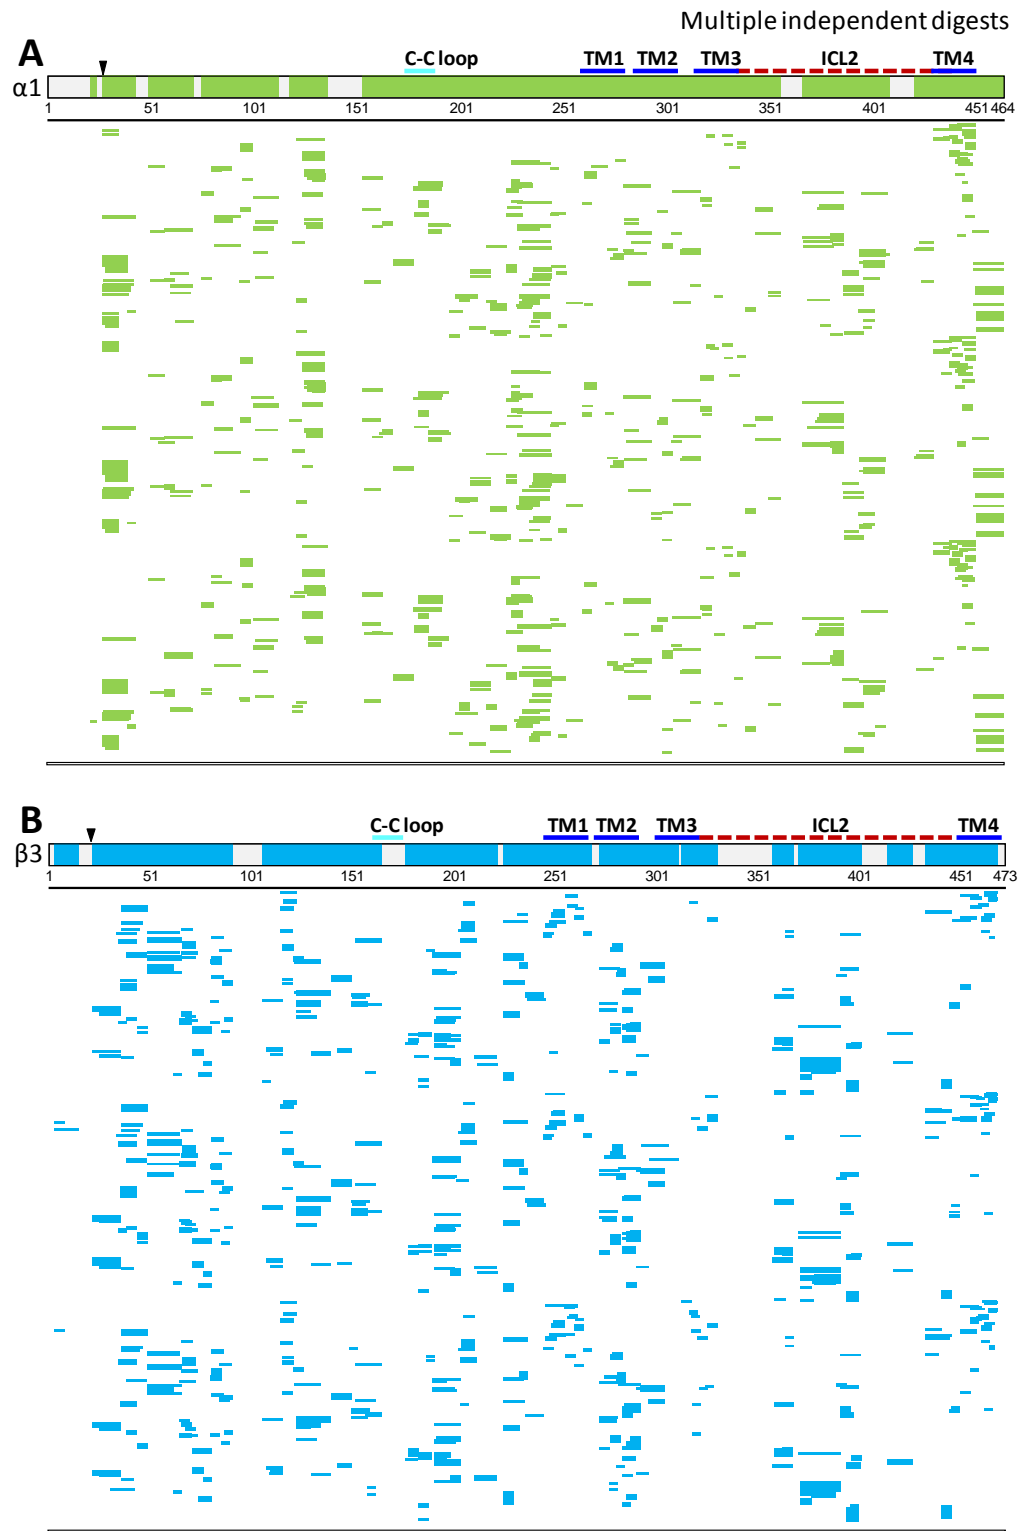

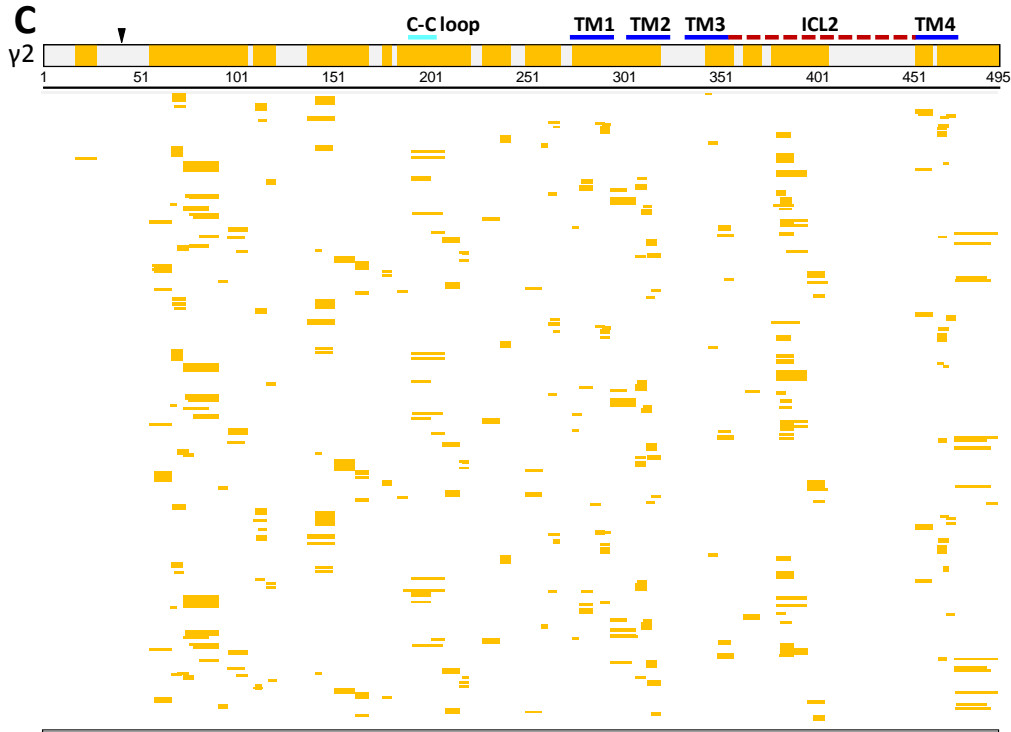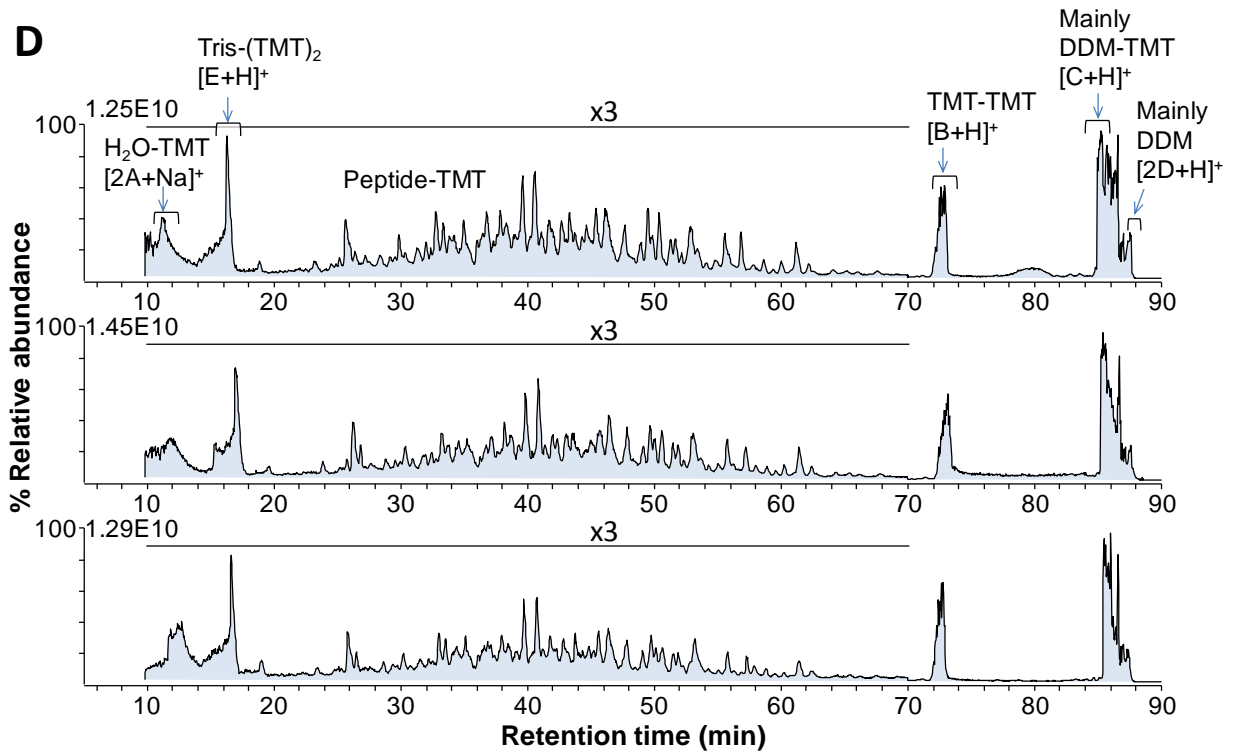

E

Rt 11

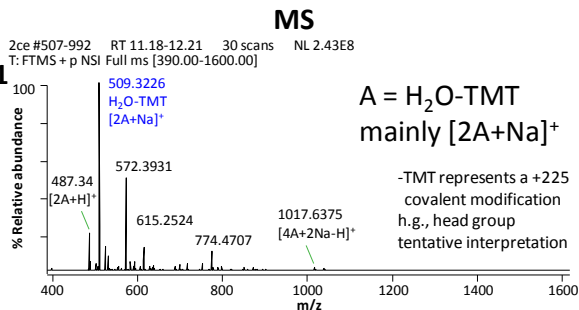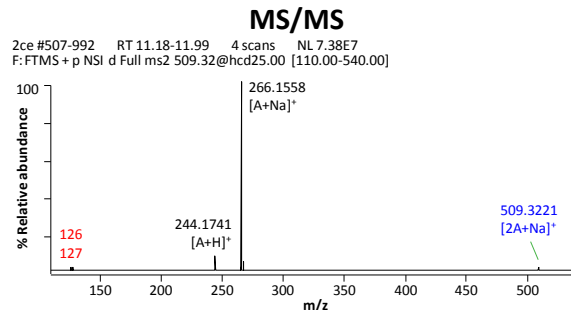

Rt 16

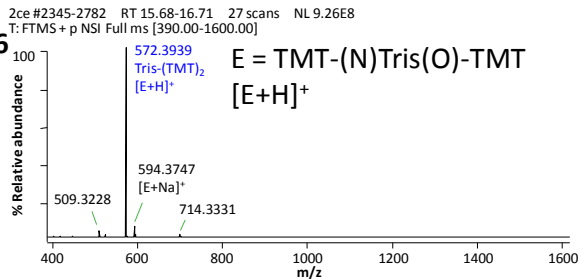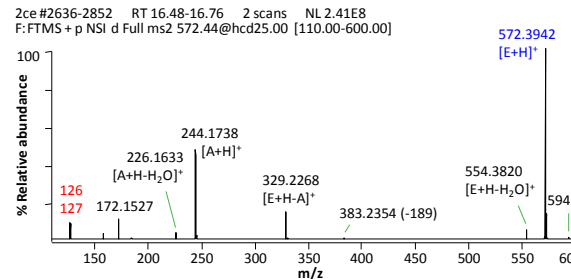

Rt 72

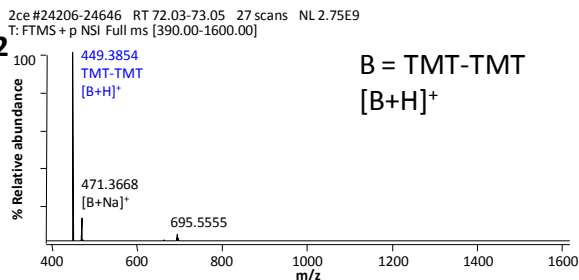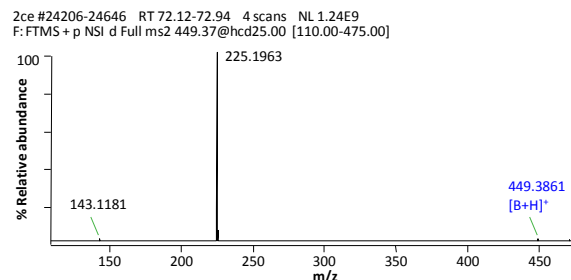

Rt 85

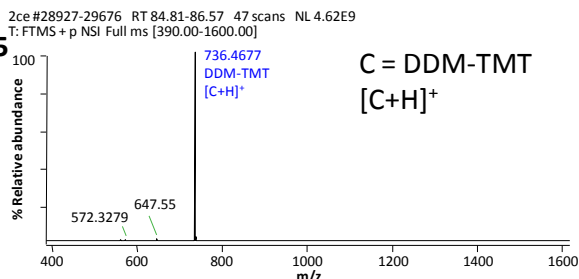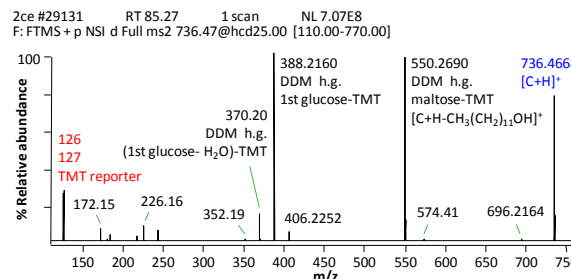

Rt 87

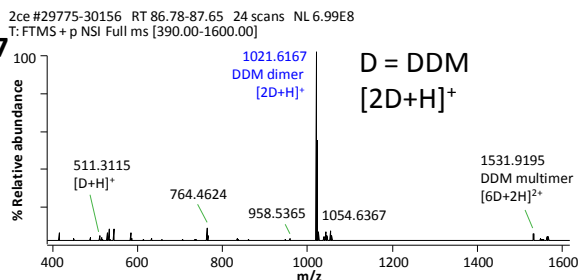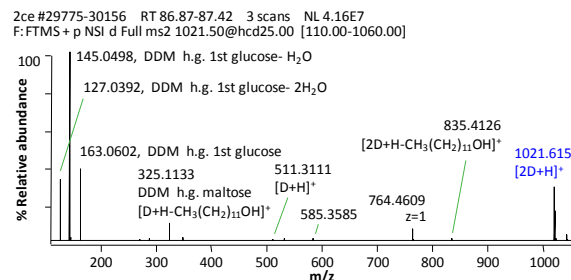



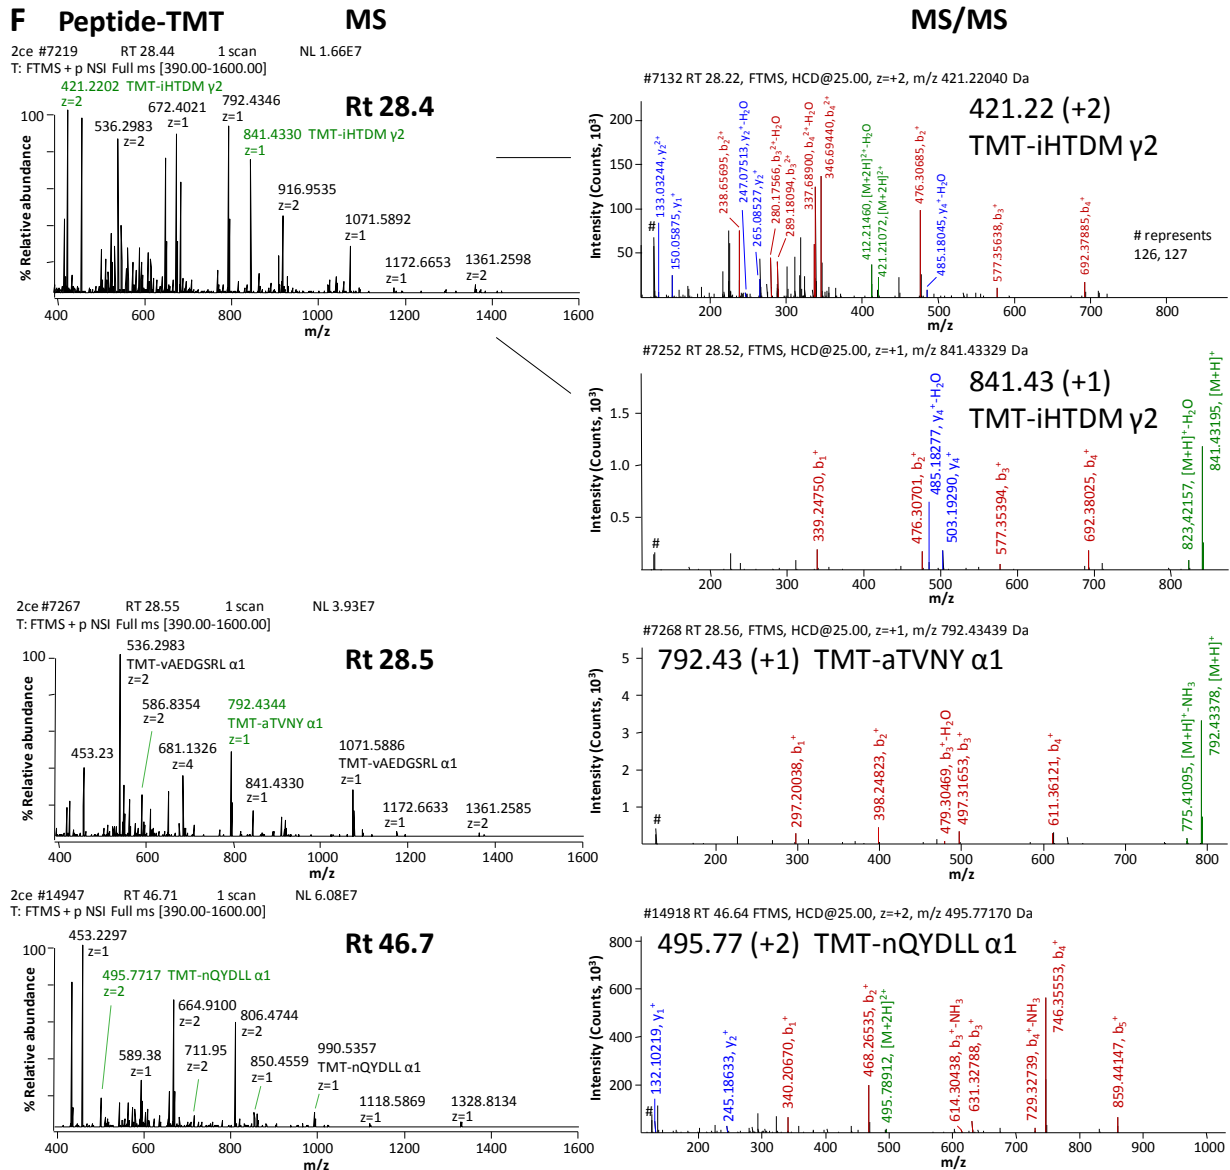

**Supplemental Figure S2.** Ox-TMT2 PSM distribution against the sequences of GABA<sub>A</sub>R subunits (ABC), supplementing Fig. 3G, HPLC MS chromatography in total ion counts from three Ox-TMT2 samples that combined multiple independent digestions, showing high peptide reproducibility (D), and representative MS and HCD MS/MS spectra for non-peptide components (E) and for typical TMT-peptides (F) at distinct elution ranges, demonstrating method tolerance. Peptides were identified at peptide FDR<1% by PD1.3 SEQUEST using b and y ions. Precursor ions were marked in blue (E) or green (F). Rt, retention time.

## Supplemental Figure S3.

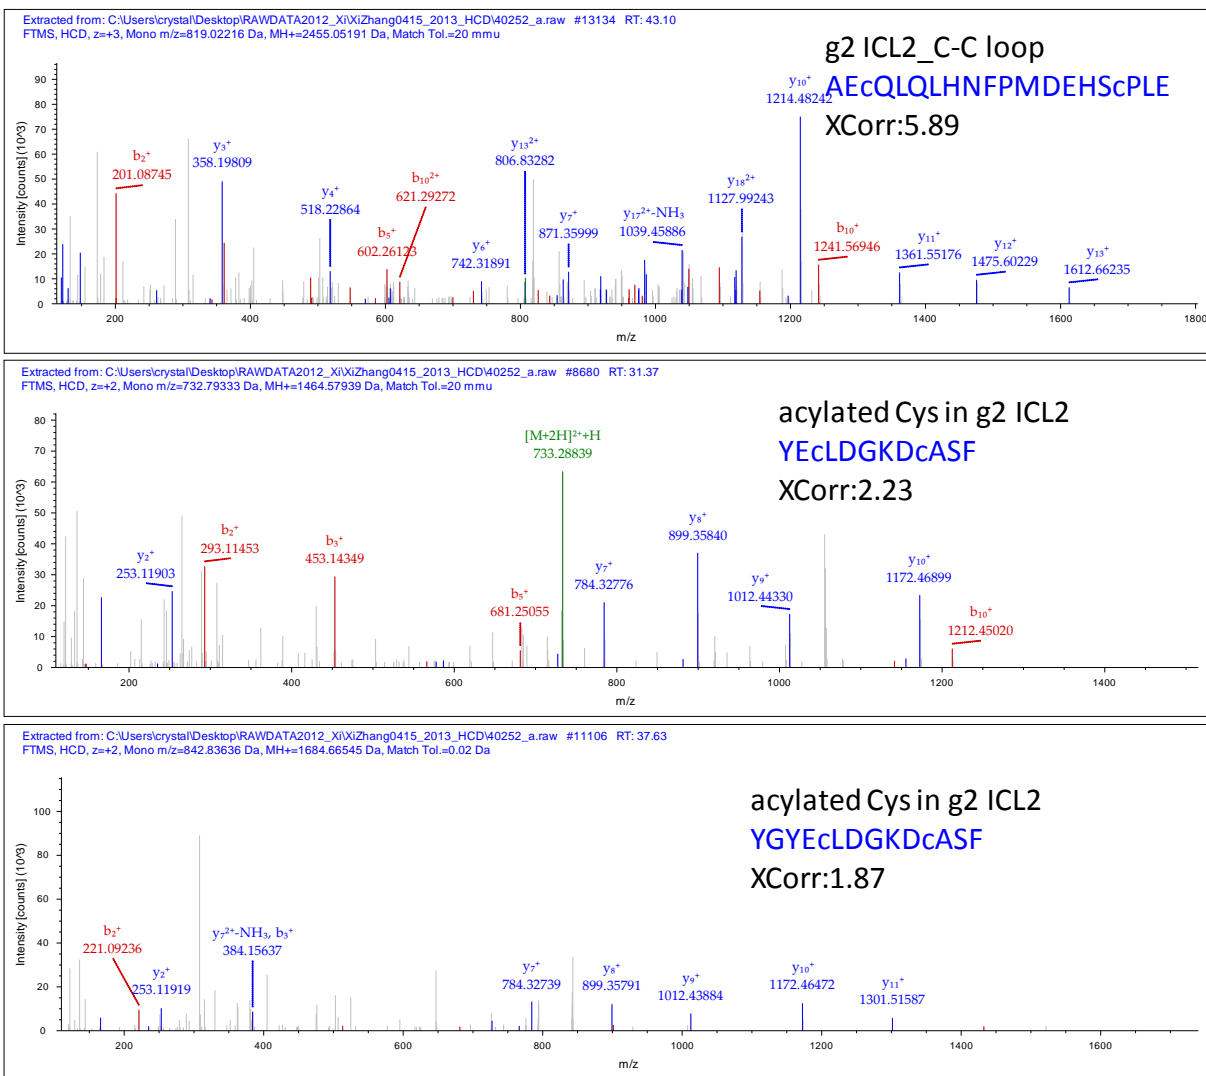

**Supplemental Figure S3.** HCD MS/MS spectra for selected Cys-PTM identifications (peptide FDR<1% by PD1.3 SEQUEST) discussed in **Fig. 2**. More annotated MS/MS spectra for tentative PTM identifications are shown in **supplemental Data**.

## Supplemental Figure S4.

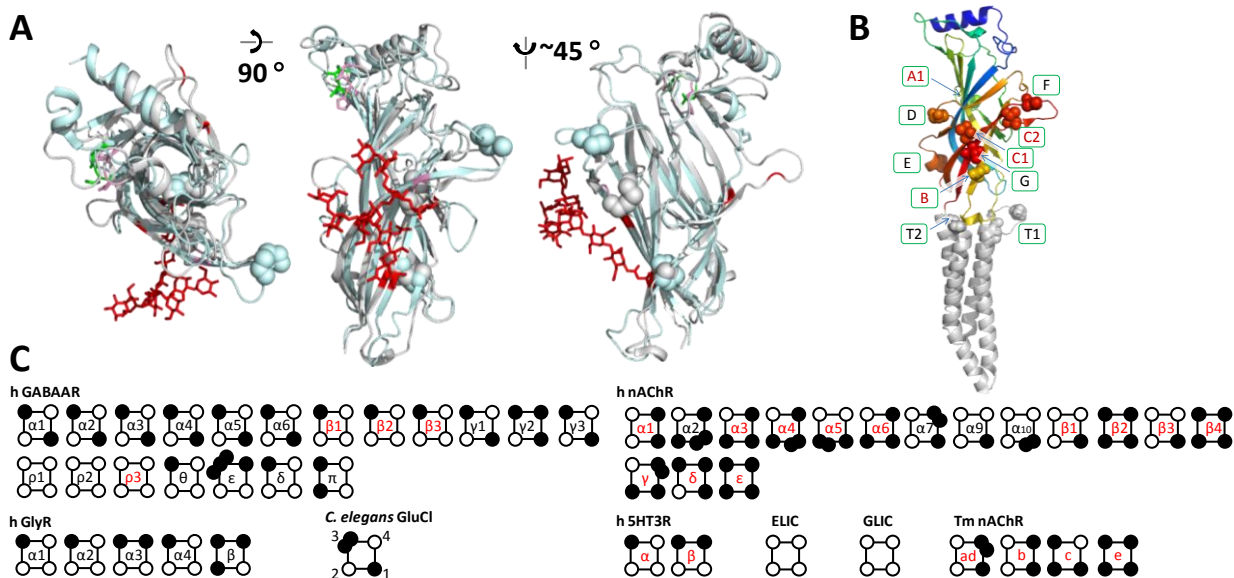

**Supplemental Figure S4.** Bases for Cys-loop hLGIC PTM signature modeling, supplementing Fig. 5. (A) 3D locations of N-glycans were estimated by sequence alignment with resolved structures of both *C. elegans* GluCl/Sf9 (3RHW, silver) and mouse  $\alpha 1$  AChR-ECD/yeast (2QC1, cyan). Red cartoon, residues corresponding to high-occupancy N-glycosylated sites identified in  $\alpha 1\beta 3\gamma 2$  hGABA<sub>A</sub>R. (B) Locations (sphere) of 8 mid-ECD N-glycosylation coding sites and two potential TMD-originated ECD-TMD interface sites, based on sequence alignment with 3RHW. ECD sequence was colored from N- (blue) to C-terminus (red). (C) TM-Cys are common to eukaryotic Cys-loop LGICs, and vary by subunits in distribution among 4 TM helices, suggesting a third layer of subunit signature—again missing in bacteria. All three TM-Cys residues in *C. elegans* GluCl were resolved as free in ivermectin-opened state (3RHW)(8), but traditional mutagenesis and Cys-crosslinking found inter-helix C-C bridges in rat  $\alpha 1\beta 1\gamma 2\delta$  GABA<sub>A</sub>R in closed but not in GABA-bound state\*. \*Ref: Jansen, M. & Akabas, M.H. *J Neurosci* **26**, 4492-4499 (2006).

Supplemental Figure S5.

# A ECD domain

|     |                                                               |     |                             |
|-----|---------------------------------------------------------------|-----|-----------------------------|
| 1   | -----                                                         | 0   | 2QC1:B PDBID CHAIN SEQUENCE |
| 1   | -----                                                         | 0   | 3RHW:A PDBID CHAIN SEQUENCE |
| 1   | -----MRKSPGLSDCLWAWILLSTLT--GRSYGQPSLQD-----                  | 33  | P14867 GBRA1_HUMAN          |
| 1   | MCSGL-----LEL---LLPIWLSWLTGTRG-----S-EPRSVNDPGNMS-----        | 35  | P28472-2 GBRB3_HUMAN        |
| 1   | -MSSPNWSTGSSVYSTPVFSQKMTVWILLLSLY--PGFTSQKSDDDYEDYASNKTWVL    | 57  | P18507-2 GBRG2_HUMAN        |
| 1   | -MDAP-----ARI---LAPLLLLCAQQLRG-----T---RAMNDIGDYVGS-----      | 34  | O14764 GBRD_HUMAN           |
| 1   | -MLAV-----PNMRFGIFLLWGWVWVLALESRMHWPGR--EVHEMSKKGKRPQRREVH    | 50  | P24046 GBRR1_HUMAN          |
| 1   | -----KSEHETRLEAKLFEDYSSVVRPVEDHREIVQVTVGLQLIQLI               | 42  | 2QC1:B PDBID CHAIN SEQUENCE |
| 1   | -----SD--SKILAHLFTSGYDFVRPPTDNGGPFVVSVNMLLRTIS                | 40  | 3RHW:A PDBID CHAIN SEQUENCE |
| 34  | -----ELK--DNTTVFTRILD--RLLDGYDNRLRPLG-GERVTEVKTDIFVTSFG       | 78  | P14867 GBRA1_HUMAN          |
| 36  | -----FVKETVD--KLLKGYDIRLRPDF-GGPPVCVGMNIDIASID                | 73  | P28472-2 GBRB3_HUMAN        |
| 58  | -----TPK--VPEGDVTVILN--NLLEGYDNKLRPDI-GVKPTLIHTDMYVNSIG       | 102 | P18507-2 GBRG2_HUMAN        |
| 35  | -----NLEISWLPNLD--GLIAGYARNFRPGI-GGPPVNVVALALEVASID           | 76  | O14764 GBRD_HUMAN           |
| 51  | EDAHKQVSPILRRSPDITKSPITKSEQLLRIDDHDFSMRPGF-GGPAIPVGVVDVQVESLD | 109 | P24046 GBRR1_HUMAN          |
|     | : : .** : : : :                                               |     |                             |
| 43  | NVDEVNQIVTTNVRKQQWVDYNLKWNPDYGGVKKI-HIPSEKIWRPDVLYNNADGDF     | 101 | 2QC1:B PDBID CHAIN SEQUENCE |
| 41  | KIDVVNMEYSAQLTLRESWIDKRLSYGVKGDGQPDFVILTVGHQIWMPTDFFPNEKQAYK  | 100 | 3RHW:A PDBID CHAIN SEQUENCE |
| 79  | PVSDHDMEYTTIDVFFRQSWKDERLKFKGP-MTVLRLN-NLMASKIWTPTDFFHNGKKSVA | 136 | P14867 GBRA1_HUMAN          |
| 74  | MVSEVNMDYTLIMYFQQYWRDKRLAYSGI-PLNLTLD-NRVADQLWVPDITYFLNDKKSFV | 131 | P28472-2 GBRB3_HUMAN        |
| 103 | PVNAINMEYTTIDIFFAQTWYDRRLKFNST-IKVLRNL-SNMVGKIWIPTDFFRNKSKADA | 160 | P18507-2 GBRG2_HUMAN        |
| 77  | HISEANMEYTMIVFLHQSWRDSRLSYNHT-NETLGLD-SRFVDKLWLPDTFIVNAKSAWF  | 134 | O14764 GBRD_HUMAN           |
| 110 | SISEVDMDFMTMLYLRHYWKDERLSFPSTNNLSMTFD-GRLVKKIWPVDMFFVHSKRSFI  | 168 | P24046 GBRR1_HUMAN          |
|     | : : : : : . * * . * : : * * : . .                             |     |                             |
| 102 | AIVKFTKVLN--DYTGHTWTPPAIFKSYCEIIVTHFPFDEQNCMSMKLGRTRYDGSVAI   | 159 | 2QC1:B PDBID CHAIN SEQUENCE |
| 101 | HTIDKPNVLIIRHNDGTVLYSVRISLVLSCPMYLQYYPMDVQCCSIDLASAYTTKDIEY   | 160 | 3RHW:A PDBID CHAIN SEQUENCE |
| 137 | HNMTMPNKLRLITDGTLLYTMRLTVRAECPMHLEDFPMDAHACPLKFGSYAYTRADEVY   | 196 | P14867 GBRA1_HUMAN          |
| 132 | HGVTVKRMIRLHPDGTVLYGLRITTTAACMMDLRRYPLDEQNCTLEIESYGYTTDDIEF   | 191 | P28472-2 GBRB3_HUMAN        |
| 161 | HWITTPNRMLRIWNGRVLVYTLRLTIDAECQLQLHNPMDHSCPLEFSSYGYPREEIVY    | 220 | P18507-2 GBRG2_HUMAN        |
| 135 | HDVTVENLIRLQPDGVILYSIRITSTVACDMDLAKYPMDEQECLMDLESYGYSSDIVY    | 194 | O14764 GBRD_HUMAN           |
| 169 | HDITTDNVMLRVQPDGKVLVSLRVVTAMCNMDFSRFPLDTCQCSLEIESYAYTEDDML    | 228 | P24046 GBRR1_HUMAN          |
|     | : : : * : : * : . : * * : * : : * : :                         |     |                             |
| 160 | NPESDQPDLS---NFMESGEWVIKEARGWKHWVYFSCCPTPYLDITYHFVMQRLP-      | 212 | 2QC1:B PDBID CHAIN SEQUENCE |
| 161 | LWKEHSPLQLKV-GLSSSLPSFQLTNTSTTY-CTSVT--NTGIYSCLRTTIQLKREFS    | 214 | 3RHW:A PDBID CHAIN SEQUENCE |
| 197 | EWREPARSVVVAEDGSRLNQYDLGQIVDSGIV-QS--STGEYVVMTHFHLKRRKIG      | 251 | P14867 GBRA1_HUMAN          |
| 192 | YWRGGDKAV--IGVERIELPQFSIVEHRLVSRNVVF--ATGAYPRLSLSFRLKRNIG     | 244 | P28472-2 GBRB3_HUMAN        |
| 221 | QWKRSSVEV--GDTRSWRLYQFSFVGLRNTTEVV-KT--TSGDYVVMVSYFDLSRRMG    | 273 | P18507-2 GBRG2_HUMAN        |
| 195 | YWSESQEH--HGLDKLQLAQFTITSYRFTTELMNFK--SAGQFPRLSLHFLRRNRG      | 248 | O14764 GBRD_HUMAN           |
| 229 | YWKKGNDL--KTDERISLSQFLIQEFHTTTKLAFYS--STGWYNRLYINFTLRRHIF     | 282 | P24046 GBRR1_HUMAN          |

**B**

| receptor/channel | subunit  | A1 = inner surface b4-b5 | length   | B = C-C loop (##.C.C.##) | length | C1/C2 = mid/upper-b9<br>pre-loopC (highly<br>diverse) | length | A2 = b5-b6 linker<br>before loopE (A2 NGT<br>is back to top surface) | length |
|------------------|----------|--------------------------|----------|--------------------------|--------|-------------------------------------------------------|--------|----------------------------------------------------------------------|--------|
| Cl_GBR_h         | α1       | KKSVAHNMTMPNKL           | 14       | AECPMHLEDFPMDAHACPL      | 19     | -----GQTVDSGIVQ                                       | 10     | LRIEDDGTLL                                                           | 10     |
| Cl_GBR_h         | α2       | KKSVAHNMTMPNKL           | 14       | AECPMHLEDFPMDAHACPL      | 19     | -----GQSIGKETIK                                       | 10     | LRIQDDGTLL                                                           | 10     |
| Cl_GBR_h         | α3       | KKSVAHNMTMPNKL           | 14       | AECPMHLEDFPMDVHACPL      | 19     | -----GHVVGTEIIR                                       | 10     | LRLVNGTLL                                                            | 10     |
| Cl_GBR_h         | α4       | KKSVSHNMTAPNKL           | 14       | AECPMRLVDFPMDGHACPL      | 19     | -----GQTVSSETIK                                       | 10     | FRIMNGTIL                                                            | 10     |
| Cl_GBR_h         | α5       | KKSIAHNMTTPNKL           | 14       | AECPMQLEDFPMDAHACPL      | 19     | -----GQTVGTENIS                                       | 10     | LRLEDGTLL                                                            | 10     |
| Cl_GBR_h         | α6       | KKSIAHNMTTPNKL           | 14       | ADCPMRLVDFPMDGHACPL      | 19     | -----GQTVSSETIK                                       | 10     | FRIMNGTIL                                                            | 10     |
| Cl_GBR_h         | β1       | KKSFVHGVTVKNRM           | 14       | AACMMDLRRYPLDEQNCPL      | 19     | DYKMSVSKKVE-----                                      | 10     | IRLHPDGTVL                                                           | 10     |
| Cl_GBR_h         | β2       | KKSFVHGVTVKNRM           | 14       | AACMMDLRRYPLDEQNCPL      | 19     | DYKLTITKVV-----                                       | 10     | IRLHPDGTVL                                                           | 10     |
| Cl_GBR_h         | β3       | KKSFVHGVTVKNRM           | 14       | AACMMDLRRYPLDEQNCPL      | 19     | EHRLVSRNVV-----                                       | 10     | IRLHPDGTVL                                                           | 10     |
| Cl_GBR_h         | β3-isof2 | KKSFVHGVTVKNRM           | 14       | AACMMDLRRYPLDEQNCPL      | 19     | EHRLVSRNVV-----                                       | 10     | IRLHPDGTVL                                                           | 10     |
| Cl_GBR_h         | γ1       | KKSDAHWITTPNRL           | 14       | AECQLQLHNFPMDEHSCPL      | 19     | GLRNSTEITH-----                                       | 10     | LRIWNDGRVL                                                           | 10     |
| Cl_GBR_h         | γ2       | KKADAHWITTPNRL           | 14       | AECQLQLHNFPMDEHSCPL      | 19     | GLRNTTEVVK-----                                       | 10     | LRIWNDGRVL                                                           | 10     |
| Cl_GBR_h         | γ2L      | KKADAHWITTPNRM           | 14       | AECQLQLHNFPMDEHSCPL      | 19     | GLRNTTEVVK-----                                       | 10     | LRIWNDGRVL                                                           | 10     |
| Cl_GBR_h         | γ3       | KTAEAHWITTPNQL           | 14       | AECQLQLHNFPMDEHSCPL      | 19     | GLRNTTEIVT-----                                       | 10     | LRIWNDGKIL                                                           | 10     |
| Cl_GBR_h         | ρ1       | KRSFIHDTTDDNVM           | 14       | AMCNMDFSRFPLDTQTCSL      | 19     | EFHTTTLKAF-----                                       | 10     | LRVQPDGKVL                                                           | 10     |
| Cl_GBR_h         | ρ2       | KRSFTHDTTDDNIM           | 14       | AMCNMDFSRFPLDSQTCSL      | 19     | KFHSTSLRAF-----                                       | 10     | LRVFPDGHVL                                                           | 10     |
| Cl_GBR_h         | ρ3       | KRSFIHDTTDMENIM          | 14       | AMCFMDFSRFPLDTQNCPL      | 19     | DFSASSGLAF-----                                       | 10     | LRVHPDGNVL                                                           | 10     |
| Cl_GBR_h         | δ        | KSAWFHDVTVENKL           | 14       | VACDMDLAKYPMDEQECML      | 19     | SYRFTTELMN-----                                       | 10     | LRIQPDGVIL                                                           | 10     |
| Cl_GBR_h         | ε        | KRTHEHEITMPNQM           | 14       | AGCSLHMLRFPMDSHSCPL      | 19     | GVSNKTEIIT-----                                       | 10     | VRIYKDGKVL                                                           | 10     |
| Cl_GBR_h         | θ        | KDAFVHDVTVENRV           | 14       | AACSLDLHKFPMDKQACNL      | 19     | -----GRTITSKEVY                                       | 10     | FQLHPDGTVR                                                           | 10     |
| Cl_GBR_h         | π        | KKSFLEHVTVGNRL           | 14       | VACNMDLSKYPMDTQTCPL      | 19     | RYFTLVTRSQ                                            | 10     | IRLFSNGTIVL                                                          | 10     |
| Cl_GluCl_Celeg   | homomer  | KQAYKHTIDKPNVL           | 14       | LSCPMYLQYYPMDVQQCSI      | 19     | -NTSTTYCTSV                                           | 10     | IRIHNDGTIVL                                                          | 10     |
| Cl_GlyR_h        | α1       | KGANFHEVTTDNKL           | 14       | LACPMDLKFNFPMDVQTCIM     | 19     | EKDLRYCTK                                             | 10     | LRIKRNKGNVL                                                          | 10     |
| Cl_GlyR_h        | α2       | KGANFHDVTTDNKL           | 14       | LSCPMDLKFNFPMDVQTCIM     | 19     | EKELGVCYCK                                            | 10     | LRIKRNKGNVL                                                          | 10     |
| Cl_GlyR_h        | α3       | KGANFHEVTTDNKL           | 14       | LSCPMDLKFNFPMDVQTCIM     | 19     | EKDLRYCTK                                             | 10     | LRIKRNKGNVL                                                          | 10     |
| Cl_GlyR_h        | α4       | KGANFHEVTTDNKL           | 14       | LSCMLDLKFNFPMDIQTCIM     | 19     | DEKDLGCCTK                                            | 10     | LRIKRNKGNVL                                                          | 10     |
| Cl_GlyR_h        | β        | KSANFHDVTVQENIL          | 14       | LSCPLDLTLFPMDTQRCKM      | 19     | KEDIEYGNCTK                                           | 11     | LFIFRDGDVQL                                                          | 10     |
| NaKCa_5HT3R_h    | α        | FVDVVGKSPNIPIY--         | 12(--)   | TACSLDIYNFPFDVQNCPL      | 19     | GVLPYFREFS                                            | 10     | VYIRHQGEVQ                                                           | 10     |
| NaKCa_5HT3R_h    | β        | FVDIERYPDLPIY--          | 12(--)   | SACSLTYAFPPFDVQNCPL      | 19     | VSSTYSILQ                                             | 10     | VVYNSSGTIE                                                           | 10     |
| NaKCa_nAChR_h    | α1       | ADGDFAIKFKTK--           | 12(--)   | SYCEIIVTHFPFDEQNCPL      | 19     | ESRGWKHSVT                                            | 10     | VLLQYTGHT                                                            | 10     |
| NaKCa_nAChR_h    | α2       | ADGEFAVTHMTK--           | 12(--)   | SSCSIDVTFPPFDQNCPL       | 19     | NATGTYNSKK                                            | 10     | AHLFSTGTVH                                                           | 10     |
| NaKCa_nAChR_h    | α3       | AVGDQVDDKTK--            | 12(--)   | SSCKIDVTYFPFDYQNCPL      | 19     | KAPGYKHDIK                                            | 10     | ALLKVTGEVT                                                           | 10     |
| NaKCa_nAChR_h    | α4       | ADGDFAVTHLTK--           | 12(--)   | SSCSIDVTFPPFDQNCPL       | 19     | DAVGTYNTRK                                            | 10     | AHLFHDGRVQ                                                           | 10     |
| NaKCa_nAChR_h    | α5       | ADGRFEGTS-TK--           | 12(--)   | SSCTIDVTFPPFDLQNCPL      | 19     | SATGSKGNRT                                            | 10     | TVIRYNGTIV                                                           | 10     |
| NaKCa_nAChR_h    | α6       | AVGDQVEGKTK--            | 12(--)   | SSCPMDLTFPPFDHQNCSL      | 19     | DASGYKHDIK                                            | 10     | ALLKYNMGT                                                            | 10     |
| NaKCa_nAChR_h    | α7       | ADERFDATFHTN--           | 12(--)   | SSCYIDVRWFPPFDVQHCKL     | 19     | GIPGKRSERF                                            | 10     | VLVNSSGHCQ                                                           | 10     |
| NaKCa_nAChR_h    | α9       | ADDESSEPVNTN--           | 12(--)   | SSCVVDVTYFPFDNQCNL       | 19     | GMPAVKNVIS                                            | 10     | VVLRVDGLIT                                                           | 10     |
| NaKCa_nAChR_h    | α10      | ADAPPPGASASTN--          | 12(--)   | SSCRVDVAAPFDDAQHCGL      | 19     | GMPARRRVLV                                            | 10     | VVLRHDGAVR                                                           | 10     |
| NaKCa_nAChR_h    | β1       | NDGNFDVALDIS--           | 12(--)   | SSCSIQVTFPPFDQNCPL       | 19     | HKPSRLIQPP                                            | 10     | VVYSSDGSVR                                                           | 10     |
| NaKCa_nAChR_h    | β2       | ADGMYEVSFYSN--           | 12(--)   | SACKIEVKHFPFDQNCPL       | 19     | ALPGRNENP                                             | 10     | AVVSYDGSIF                                                           | 10     |
| NaKCa_nAChR_h    | β3       | ADGRFEGSLMTK--           | 12(--)   | SSCTMDVTFPPFDQNCPL       | 19     | NAKGMKGNRR                                            | 10     | VIVKSNGTIV                                                           | 10     |
| NaKCa_nAChR_h    | β4       | ADGTYEVSVYTN--           | 12(--)   | SACKIEVKYFPFDQNCPL       | 19     | ALPGRRTVNP                                            | 10     | LIVRSNGSVL                                                           | 10     |
| NaKCa_nAChR_h    | γ        | VDGVEFEVALYCN--          | 12(--)   | SACCSISVTFPPFDWQNCPL     | 19     | HRPAKMLLDP                                            | 10     | VLVSPDGCYI                                                           | 10     |
| NaKCa_nAChR_h    | δ        | NDGSPQISYSCN--           | 12(--)   | SSCPISVTFPPFDWQNCPL      | 19     | HRPARVNVDP                                            | 10     | VLVYHYGFVY                                                           | 10     |
| NaKCa_nAChR_h    | ε        | IDGQFGVAYDAN--           | 12(--)   | SVCAVEVTYFPFDWQNCPL      | 19     | FCPGVIRRH                                             | 10     | VLVYEGGSVT                                                           | 10     |
| NaKCa_nAChR_Tm   | a=d      | ADGDFAIKFKTK--           | 12(--)   | SYCEIIVTHFPFDDQNCPL      | 19     | DYRGWKHWVY                                            | 10     | LLLDYTGKIM                                                           | 10     |
| NaKCa_nAChR_Tm   | b        | NDGSFEITLHVN--           | 12(--)   | SSCTIKVMYFPFDWQNCPL      | 19     | HKPSRKNWRS                                            | 10     | VLVQHTGAVS                                                           | 10     |
| NaKCa_nAChR_Tm   | c        | NDGQYNVAYFCN--           | 12(--)   | SSCPINVLVFPFDWQNCPL      | 19     | HKPAKKNYIG                                            | 10     | VLVVRPNGYMT                                                          | 10     |
| NaKCa_nAChR_Tm   | e        | VDGQFEVAYYAN--           | 12(--)   | STCPPIAVTYFPFDWQNCPL     | 19     | HRPAKKNYNW                                            | 10     | VLVYNDGSMY                                                           | 10     |
| NaKCa_nAChBP_Ac  | AChBP    | TRPVQV---LSPQI           | 11(---)  | FMCDPTGV-DSEEGVTCAV      | 18     | SATQTRQVQH                                            | 10     | AVVTHDGSVM                                                           | 10     |
| NaKCa_nAChR_m    | a1_AChBP | ADGDFAIKFKTK--           | 12(--)   | SYCEIIVTHFPFDEQNCPL      | 19     | EARGWKHWVF                                            | 10     | VLLDYTGHT                                                            | 10     |
| NaKCa_ELIC_xtl   | homomer  | VGSPD---TGNKR            | 10(----) | FSNDMDFRLFPFDRQQFVL      | 19     | KASTHISDIR                                            | 10     | LMLFPDGRVI                                                           | 10     |
| NaKCa_GLIC_xtl   | homomer  | ENARD---ADVVD            | 10(----) | VLSPDLFRYFPFDSQTLHI      | 19     | SFTAVVKPAN                                            | 10     | ISVSPDGTIVQ                                                          | 10     |

**Supplemental Figure S5.** ECD sequence alignment of hGABA<sub>A</sub>R (GBR) subunits with 3RHW and 2QC1 (A), and detailed sequences of the four major coding regions (A1, B, C1/C2) pinpointed by screening for mid-ECD NXS/T motif across Cys-loop hLGICs (B), supplementing Fig. 5A and 5E.

## Supplemental Figure S6.

## A TM3-ICL2-TM4

|     |                             |        |          |       |       |       |      |       |     |        |             |
|-----|-----------------------------|--------|----------|-------|-------|-------|------|-------|-----|--------|-------------|
| 1   | PLIGEYLVFTMI FVLSIMVTFVAINI | HRSSST | HNAMAPLV | RMIFL | HLPL  | LLCQR | RS   | TV    | 60  | P30532 | ACHA5_HUMAN |
| 1   | PLIGEYLLFTMI FVLSIVITVFLNIV | HR     | TPPT     | TH    | TPSWK | IVLNL | LR   | VFMFM | 59  | P32297 | ACHA3_HUMAN |
| 1   | PLIGEYLLFTMI FVLSIVITVFLNIV | HRSSSY | HPMAPW   | KLFLQ | KL    | LLC   | MD   | TV    | 60  | Q05901 | ACHB3_HUMAN |
| 1   | PLIGVYFVCMALLVLSLAETIFIV    | HLV    | HKDL     | QQ    | VP    | PAWL  | RHLV | LEH   | 59  | P46098 | SHT3A_HUMAN |
| 61  | DRYFQKEE                    | ---    | TE       | ---   | ---   | ---   | ---  | ---   | 71  | P30532 | ACHA5_HUMAN |
| 60  | SNEGNAQ                     | FR     | PLYGAL   | ENL   | NCFS  | RAES  | GC   | EGYPC | 119 | P32297 | ACHA3_HUMAN |
| 61  | DYSSPEKE                    | ---    | ESQ      | FPV   | KG    | V     | ---  | IE    | 86  | Q05901 | ACHB3_HUMAN |
| 60  | TSQRPPATSQAT                | HT     | ---      | DDCSA | ---   | ---   | ---  | MGN   | 97  | P46098 | SHT3A_HUMAN |
| 72  | -SGS                        | ---    | GP       | SSN   | NLE   | AA    | LD   | SIR   | 122 | P30532 | ACHA5_HUMAN |
| 120 | SSSSESVDAVLSLSALSPEI        | REAI   | QSV      | YIA   | EN    | MC    | QNEA | WEI   | 179 | P32297 | ACHA3_HUMAN |
| 87  | QLSD                        | ---    | GE       | NLV   | VA    | FL    | EA   | AD    | 138 | Q05901 | ACHB3_HUMAN |
| 98  | ---                         | DL     | CS       | PP    | FR    | EA    | SL   | QL    | 152 | P46098 | SHT3A_HUMAN |
| 123 | WTFLFVSI                    | VS     | SL       | GL    | FE    | VV    | Y    | Y     | 158 | P30532 | ACHA5_HUMAN |
| 180 | WVFTLVCIL                   | GTAG   | LF       | LQ    | P     | MA    | REDA | ---   | 204 | P32297 | ACHA3_HUMAN |
| 139 | WLFLLVSV                    | TV     | SG       | LV    | IF    | T     | PA   | L     | 165 | Q05901 | ACHB3_HUMAN |
| 153 | HTYLLAVL                    | AV     | SI       | TL    | V     | ML    | W    | SI    | 176 | P46098 | SHT3A_HUMAN |
| 1   | TAMDWFI                     | AV     | CV       | FV    | ES    | AL    | E    | F     | 46  | P14867 | GBRA1_HUMAN |
| 1   | TAMDLFV                     | SV     | CF       | IF    | ES    | AL    | E    | G     | 52  | P18507 | GBRG2_HUMAN |
| 1   | KAIMDML                     | MG     | CF       | VE    | F     | AL    | L    | E     | 55  | P28472 | GBRB2_HUMAN |
| 1   | TAMDWFI                     | AV     | CV       | FV    | ES    | AL    | E    | F     | 51  | Q16445 | GBRA6_HUMAN |
| 1   | KALDVY                      | FW     | IC       | TV    | FA    | AL    | E    | F     | 53  | O14764 | GBRD_HUMAN  |
| 1   | KALDIN                      | W      | AV       | CL    | LE    | V     | ES   | AL    | 53  | P23415 | GLRA1_HUMAN |
| 1   | KALDVW                      | LL     | IC       | LL    | FG    | RS    | LV   | AV    | 57  | P48167 | GLRB_HUMAN  |
| 47  | ---                         | ---    | ---      | ---   | ---   | ---   | ---  | ---   | 70  | P14867 | GBRA1_HUMAN |
| 53  | ---                         | ---    | ---      | ---   | ---   | ---   | ---  | ---   | 77  | P18507 | GBRG2_HUMAN |
| 56  | NWVDA                       | H      | GN       | LL    | T     | S     | L    | E     | 109 | P28472 | GBRB3_HUMAN |
| 52  | ---                         | ---    | ---      | ---   | ---   | ---   | ---  | ---   | 82  | Q16445 | GBRA6_HUMAN |
| 54  | ---                         | ---    | ---      | ---   | ---   | ---   | ---  | ---   | 81  | O14764 | GBRD_HUMAN  |
| 54  | ---                         | ---    | ---      | ---   | ---   | ---   | ---  | ---   | 74  | P23415 | GLRA1_HUMAN |
| 58  | NIVNIGT                     | GV     | IST      | ---   | ---   | ---   | ---  | ---   | 104 | P48167 | GLRB_HUMAN  |
| 71  | ---                         | ---    | ---      | ---   | ---   | ---   | ---  | ---   | 126 | P14867 | GBRA1_HUMAN |
| 78  | ---                         | ---    | ---      | ---   | ---   | ---   | ---  | ---   | 126 | P18507 | GBRG2_HUMAN |
| 110 | ---                         | ---    | ---      | ---   | ---   | ---   | ---  | ---   | 162 | P28472 | GBRB3_HUMAN |
| 83  | ---                         | ---    | ---      | ---   | ---   | ---   | ---  | ---   | 134 | Q16445 | GBRA6_HUMAN |
| 82  | ---                         | ---    | ---      | ---   | ---   | ---   | ---  | ---   | 137 | O14764 | GBRD_HUMAN  |
| 75  | ---                         | ---    | ---      | ---   | ---   | ---   | ---  | ---   | 132 | P23415 | GLRA1_HUMAN |
| 105 | ELSNV                       | DC     | Y        | CG    | Y     | F     | I    | V     | 164 | P48167 | GLRB_HUMAN  |
| 127 | VYVATY                      | LN     | RE       | Q     | L     | A     | P    | T     | 146 | P14867 | GBRA1_HUMAN |
| 127 | VYVWSY                      | LYL    | ---      | ---   | ---   | ---   | ---  | ---   | 135 | P18507 | GBRG2_HUMAN |
| 163 | VYVWY                       | YV     | ---      | ---   | ---   | ---   | ---  | ---   | 170 | P28472 | GBRB3_HUMAN |
| 135 | VYVWY                       | YV     | ---      | ---   | ---   | ---   | ---  | ---   | 153 | Q16445 | GBRA6_HUMAN |
| 138 | IYWAY                       | AM     | ---      | ---   | ---   | ---   | ---  | ---   | 145 | O14764 | GBRD_HUMAN  |
| 133 | FYVYI                       | Y      | ---      | ---   | ---   | ---   | ---  | ---   | 149 | P23415 | GLRA1_HUMAN |
| 165 | IYWSI                       | Y      | ---      | ---   | ---   | ---   | ---  | ---   | 171 | P48167 | GLRB_HUMAN  |

## B

| neuronal cation channels             | estimated pI | pH7.5 charge | KR-DE | sum DE | sum KR |
|--------------------------------------|--------------|--------------|-------|--------|--------|
| <b>TM3-ICL2-TM4</b>                  |              |              |       |        |        |
| 5HT3R $\alpha$                       | 7.8          | 0.7          | 1     | 17     | 18     |
| nAChR $\alpha$ 3                     | 8.0          | 1.5          | 2     | 18     | 20     |
| nAChR $\alpha$ 5                     | 9.3          | 4.3          | 4     | 13     | 17     |
| nAChR $\beta$ 3 *                    | 9.7          | 9.3          | 9     | 14     | 23     |
| <b>Cl<sup>-</sup> channels</b>       |              |              |       |        |        |
| GlyR $\alpha$ 1                      | 10.0         | 10.9         | 11    | 13     | 24     |
| GlyR $\beta$                         | 9.4          | 9.3          | 10    | 14     | 24     |
| GABAAR $\alpha$ 1                    | 9.7          | 8.7          | 9     | 12     | 21     |
| GABAAR $\beta$ 3                     | 9.9          | 10.1         | 10    | 16     | 26     |
| GABAAR $\delta$                      | 10.0         | 9.7          | 10    | 12     | 22     |
| GABAAR $\gamma$ 2 $\dagger$          | 8.2          | 2.4          | 3     | 15     | 18     |
| GABAAR $\alpha$ 6 #                  | 9.0          | 2.8          | 3     | 11     | 14     |
| * nAChR $\beta$ 3_1st half           | 9.5          | 5            | 5     | 7      | 12     |
| * nAChR $\beta$ 3_2nd half           | 9.6          | 4.1          | 4     | 7      | 11     |
| $\dagger$ GABAAR $\gamma$ 2_1st half | 9.7          | 4.8          | 5     | 6      | 11     |
| $\dagger$ GABAAR $\gamma$ 2_2nd half | 5.8          | -2.6         | -2    | 9      | 7      |
| # GABAAR $\alpha$ 6_1st half         | 9.2          | 2.8          | 3     | 6      | 9      |
| # GABAAR $\alpha$ 6_2nd half         | 6.6          | -0.3         | 0     | 5      | 5      |

Sequence pI and charge state at pH 7.5 were estimated by using program at <http://www.scripps.edu/cgi-bin/cdputnam/protcal3>

**Supplemental Figure S6.** Sequence alignments of the ICL2 of human Cl<sup>-</sup> and cation channels showed high diversity (sequences showing TM3-ICL2-TM4) (A), and counting of K/R and D/E residues in TM3-ICL2-TM4 highlighted their differences in ICL2 K/R and D/E distribution (B), supplementing Fig. 5A. The subunits' TM3 and TM4 helices each contains only one or zero of each of the K, R, D and E residues.



Supplemental Figure S7.

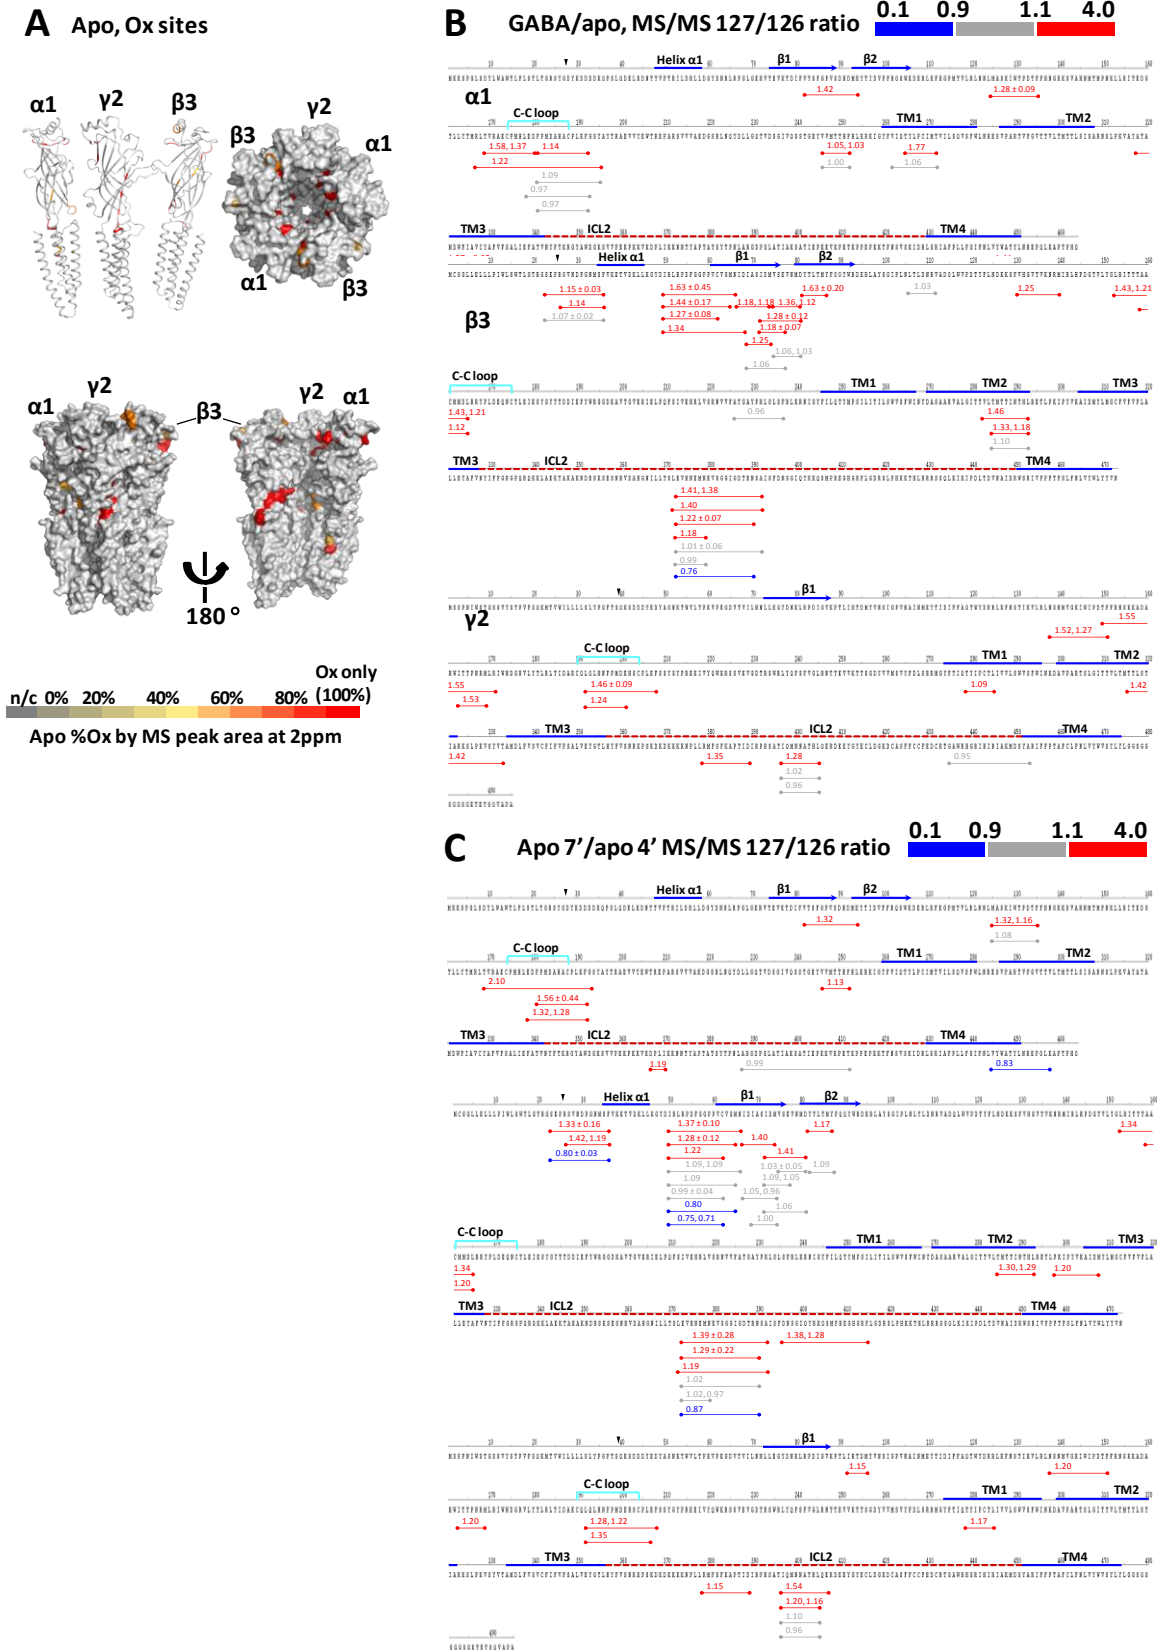

**Supplemental Figure S7.** Applicability to direct Ox-TMT structural mapping of GABA<sub>A</sub>R. **(A)** H<sub>2</sub>O<sub>2</sub>-oxidized residues pinpointed in apo GABA<sub>A</sub>R (labeled by H<sub>2</sub>O<sub>2</sub> for 7 and 4 min, combined), marked on 3D model (3RHW). Oxidation occupancy was estimated by MS peak area (PD1.4). **(B)** Tentative MS/MS 127/126 ratios in GABA-bound/apo GABA<sub>A</sub>R (each H<sub>2</sub>O<sub>2</sub>-labeled for 7 min) mapped to protein sequence, showing only H<sub>2</sub>O<sub>2</sub>-oxidized peptides. **(C)** MS/MS 127/126 ratios for apo 7'/apo 4' GABA<sub>A</sub>R. Full list of GABA/apo MS/MS 127/126 peptides was shown in **supplemental Table S7**.



**Supplemental Note S1.** Calculation of column-residence time.

We defined enzyme-protein overall contact time as the residence time of protein solution in the enzyme column operated as a plug-flow reactor (**Fig. 1C**).

POROS beads (enzyme-immobilized): spheres, diameter  $d = 20 \mu\text{m}$ .

Cylindrical cartridge: internal diameter  $D = 1 \text{ mm}$  (50 fold as large as bead diameter), length  $L = 20 \text{ mm}$ , so empty cartridge capacity  $C$  is,

$$C = L (\pi D^2 / 4) = 20 (3.14 \times 1^2 / 4) = 15.7 \text{ mm}^3 = 15.7 \mu\text{L}$$

Assuming porosity of packed column  $\rho = 26 \%$  (cylindrical cartridge tightly packed with small spheres at size ratio 50 : 1), the volume for solution in packed column  $v$  is,

$$v = \rho C = \rho L (\pi D^2 / 4) = 26\% \times 20 (3.14 \times 1^2 / 4) = 26\% \times 15.7 = 4.1 \text{ mm}^3 = 4.1 \mu\text{L}.$$

When flow rate through column  $u_1$  is  $25 \mu\text{L}/\text{min}$ , time of column residence for protein  $t_1$  is,

$$t_1 = v / u_1 = 4.1 \mu\text{L} / (25 \mu\text{L}/\text{min}) = 4.1 \mu\text{L} / (0.42 \mu\text{L}/\text{s}) = 9.8 \text{ s, sub-10 seconds.}$$

When flow rate through column  $u_2$  is  $50 \mu\text{L}/\text{min}$ , time of column residence for protein  $t_2$  is,

$$t_2 = v / u_2 = 4.1 \mu\text{L} / (50 \mu\text{L}/\text{min}) = 4.1 \mu\text{L} / (0.82 \mu\text{L}/\text{s}) = 4.9 \text{ s.}$$

For the  $2 \text{ mm i.d.} \times 20 \text{ mm}$  PNGase F column applied at flow rate ( $u^\circ$ )  $2 \mu\text{L}/\text{min}$ ,

$$v^\circ = \rho C^\circ = \rho L (\pi D^2 / 4) = 26\% \times 20 (3.14 \times 2^2 / 4) = 26\% \times 62.8 = 16.3 \text{ mm}^3 = 16.3 \mu\text{L}.$$

$$t^\circ = v^\circ / u^\circ = 16.3 \mu\text{L} / (2 \mu\text{L}/\text{min}) = 16.3 \mu\text{L} / (0.03 \mu\text{L}/\text{s}) = 490.0 \text{ s} = 8.2 \text{ min.}$$

**Supplemental Note S2.** A catalytic site-occupancy model for digestion to overcome bias and enhance efficiency.

We defined protein abundance biases on digestion at two levels: **Type I** ( $\sum H_{\text{pept}} / \sum L_{\text{pept}} \neq H_{\text{prot}} / L_{\text{prot}}$ ), the abundance ratio of total peptide products (all forms) for the high (H)- and low (L)-abundance species doesn't maintain the ratio of their original protein substrates, and **Type II** ( $H_{\text{pept}}^i / H_{\text{prot}} \neq L_{\text{pept}}^i / L_{\text{prot}}$ ), the transmission of a given peptide (harboring residue of interest  $i$ ,  $i$ -peptide) from its original protein substrate varies with protein's relative abundance (fraction of total proteins), meaning when the protein's relative abundance changes between samples, the distribution of the form and quantity of its peptide products also varies. Type I bias concerns quantitation by PSMs, and type II bias may skew peptide-centric quantitation by peak area or height. Further bias from protease preference sites can be explained by reaction kinetics.

#### *Digestion model assuming completion of reactions*

To address both types of protein abundance biases, we proposed a catalytic site-occupancy model to describe protein digestion in pepsin column (**Fig. 1D**). We started with a simplified model assuming each reaction reaches completion, and considered kinetics afterwards. We defined digestion as effective catalytic site occupation: an accessible cleavage site in a protein or peptide substrate occupies an effective catalytic site on pepsin column. For the tightly packed pepsin column (20  $\mu\text{m}$  diameter spherical beads in 1 mm i.d. x20 mm column, 25  $\mu\text{L}/\text{min}$ ), we assumed the protein solution flows through the column in an ideal plug-flow mode (**Fig. 1C**), where each starting species travels the same length (column length) at the same flow

rate. As a slice of protein solution moves along the column, proteins undergo sequential micro-digestion events, and meet a fresh slice of pepsin sites for each new event.

| Digestion event n        | 1        | 2...       | 3 (ne)     | ne+1        | ne+2        | ne+3         | ne+4... nlast |               |            |             |             |             |            |            |            |            |            |            |            |             |          |        |             |          |            |            |            |           |            |
|--------------------------|----------|------------|------------|-------------|-------------|--------------|---------------|---------------|------------|-------------|-------------|-------------|------------|------------|------------|------------|------------|------------|------------|-------------|----------|--------|-------------|----------|------------|------------|------------|-----------|------------|
| b=320                    | 320      | 320        | 320        | 320         | 320         | 320          | 320           |               |            |             |             |             |            |            |            |            |            |            |            |             |          |        |             |          |            |            |            |           |            |
| pre-dig total substrates | 60+20=80 | 120+40=160 | 240+80=320 | 480+160=640 | 720+240=960 | 960+320=1280 | 1200+400=1600 | 1440+480=1920 |            |             |             |             |            |            |            |            |            |            |            |             |          |        |             |          |            |            |            |           |            |
| post-dig pep             | 120/40=3 | 240/80=3   | 480/160=3  | 720/240=3   | 960/320=3   | 1200/400=3   | 1440/480=3    |               |            |             |             |             |            |            |            |            |            |            |            |             |          |        |             |          |            |            |            |           |            |
| Hsubtotal/Lsubtotal      |          |            |            |             |             |              |               |               |            |             |             |             |            |            |            |            |            |            |            |             |          |        |             |          |            |            |            |           |            |
| H%*(s-p) transmission    | 100%     | 100%       | 100%       | 1/2         | 1/3         | 1/4          | 1/5           |               |            |             |             |             |            |            |            |            |            |            |            |             |          |        |             |          |            |            |            |           |            |
| Hprot=60(*60)            | 120(*60) | 240(*60)   | 480(*60)   | 240(*30)    | 480(*30)    | 160(*10)     | 320(*10)      | 80(*2.5)      | 160(*2.5)  | 32(*0.5)    | 64(*0.5)    |             |            |            |            |            |            |            |            |             |          |        |             |          |            |            |            |           |            |
|                          |          |            |            |             |             |              |               |               |            | 128(*2)     |             |             |            |            |            |            |            |            |            |             |          |        |             |          |            |            |            |           |            |
|                          |          |            |            |             |             |              |               |               |            | 240(*7.5)   | 48(*1.5)    | 96(*1.5)    |            |            |            |            |            |            |            |             |          |        |             |          |            |            |            |           |            |
|                          |          |            |            |             |             |              |               |               |            |             | 192(*6)     |             |            |            |            |            |            |            |            |             |          |        |             |          |            |            |            |           |            |
|                          |          |            |            |             |             |              |               |               |            | 320(*20)    | 80(*5)      | 160(*5)     | 64(*1)     |            |            |            |            |            |            |             |          |        |             |          |            |            |            |           |            |
|                          |          |            |            |             |             |              |               |               |            |             |             | 128(*4)     |            |            |            |            |            |            |            |             |          |        |             |          |            |            |            |           |            |
|                          |          |            |            |             |             |              |               |               |            |             |             | 240(*15)    | 48(*3)     | 96(*3)     |            |            |            |            |            |             |          |        |             |          |            |            |            |           |            |
|                          |          |            |            |             |             |              |               |               |            |             |             |             | 192(*12)   |            |            |            |            |            |            |             |          |        |             |          |            |            |            |           |            |
|                          |          |            |            |             |             |              |               |               |            |             |             |             | 240(*30)   | 80(*10)    | 160(*10)   | 40(*2.5)   | 80(*2.5)   | 16(*0.5)   | 32(*0.5)   |             |          |        |             |          |            |            |            |           |            |
|                          |          |            |            |             |             |              |               |               |            |             |             |             |            |            |            |            |            |            | 64(*2)     |             |          |        |             |          |            |            |            |           |            |
|                          |          |            |            |             |             |              |               |               |            |             |             |             |            |            |            |            |            |            | 120(*7.5)  | 24(*1.5)    | 48(*1.5) |        |             |          |            |            |            |           |            |
|                          |          |            |            |             |             |              |               |               |            |             |             |             |            |            |            |            |            |            |            | 96(*6)      |          |        |             |          |            |            |            |           |            |
|                          |          |            |            |             |             |              |               |               |            |             |             |             |            |            |            |            |            |            |            | 160(*20)    | 40(*5)   | 80(*5) | 16(*1)      | 32(*1)   |            |            |            |           |            |
|                          |          |            |            |             |             |              |               |               |            |             |             |             |            |            |            |            |            |            |            |             |          | 64(*4) |             |          |            |            |            |           |            |
|                          |          |            |            |             |             |              |               |               |            |             |             |             |            |            |            |            |            |            |            |             |          |        | 120(*15)    | 24(*3)   | 48(*3)     |            |            |           |            |
|                          |          |            |            |             |             |              |               |               |            |             |             |             |            |            |            |            |            |            |            |             |          |        |             | 96(*12)  |            |            |            |           |            |
| L%*(s-p) transmission    | 100%     | 100%       | 100%       | 1/2         | 1/3         | 1/4          | 1/5           |               |            |             |             |             |            |            |            |            |            |            |            |             |          |        |             |          |            |            |            |           |            |
| Lprot=20(*20)            | 40(*20)  | 80(*20)    | 160(*20)   | 80(*10)     | 160(*10)    | 53.3(*3.3)   | 106.7(*3.3)   | 26.7(*0.8)    | 53.3(*0.8) | 10.7(*0.17) | 21.4(*0.17) |             |            |            |            |            |            |            |            |             |          |        |             |          |            |            |            |           |            |
|                          |          |            |            |             |             |              |               |               |            |             | 42.6(*0.66) |             |            |            |            |            |            |            |            |             |          |        |             |          |            |            |            |           |            |
|                          |          |            |            |             |             |              |               |               |            |             | 80(*2.5)    | 16(*0.5)    | 32(*0.5)   |            |            |            |            |            |            |             |          |        |             |          |            |            |            |           |            |
|                          |          |            |            |             |             |              |               |               |            |             |             | 64(*2.0)    |            |            |            |            |            |            |            |             |          |        |             |          |            |            |            |           |            |
|                          |          |            |            |             |             |              |               |               |            |             |             | 106.7(*6.7) | 26.7(*1.7) | 53.3(*1.7) | 21.4(*0.3) |            |            |            |            |             |          |        |             |          |            |            |            |           |            |
|                          |          |            |            |             |             |              |               |               |            |             |             |             | 42.6(*1.3) |            |            |            |            |            |            |             |          |        |             |          |            |            |            |           |            |
|                          |          |            |            |             |             |              |               |               |            |             |             |             | 80(*5.0)   | 16(*1.0)   | 32(*1.0)   |            |            |            |            |             |          |        |             |          |            |            |            |           |            |
|                          |          |            |            |             |             |              |               |               |            |             |             |             |            | 64(*4.0)   |            |            |            |            |            |             |          |        |             |          |            |            |            |           |            |
|                          |          |            |            |             |             |              |               |               |            |             |             |             |            | 80(*10)    | 26.7(*3.3) | 53.3(*3.3) | 13.3(*0.8) | 26.7(*0.8) | 5.3(*0.17) | 10.6(*0.17) |          |        |             |          |            |            |            |           |            |
|                          |          |            |            |             |             |              |               |               |            |             |             |             |            |            |            |            |            |            |            |             |          |        | 21.4(*0.66) |          |            |            |            |           |            |
|                          |          |            |            |             |             |              |               |               |            |             |             |             |            |            |            |            |            |            |            |             |          |        |             | 40(*2.5) | 8(*0.5)    | 16(*0.5)   |            |           |            |
|                          |          |            |            |             |             |              |               |               |            |             |             |             |            |            |            |            |            |            |            |             |          |        |             |          | 53.3(*6.7) | 13.3(*1.7) | 26.7(*1.7) | 5.3(*0.3) | 10.6(*0.3) |
|                          |          |            |            |             |             |              |               |               |            |             |             |             |            |            |            |            |            |            |            |             |          |        |             |          |            |            | 21.4(*1.3) |           |            |
|                          |          |            |            |             |             |              |               |               |            |             |             |             |            |            |            |            |            |            |            |             |          |        |             |          |            |            | 40(*5.0)   | 8(*1.0)   | 16(*1.0)   |
|                          |          |            |            |             |             |              |               |               |            |             |             |             |            |            |            |            |            |            |            |             |          |        |             |          |            |            |            | 32(*4.0)  |            |

**Figure SN1.** Product formation in the catalytic site-occupancy model for digestion to understand biases, assuming instant completion of each reaction. For illustration, total effective enzyme catalytic site surface concentration (b) is 320, and starting protein concentration is 60 and 20 for high(H)- and low(L)-abundance species respectively. Red dash line, digestion.  $n_e$ ,  $n_{equal}$ , the theoretical digestion event number when total substrates (a) equal b, here  $n_e = 3$ . \*, protein or peptide containing a given residue of interest. S-P, substrate to peptide.

The starting model assumed: 1) Reaction rates of site adsorption/desorption  $\gg$  bond cleavage  $\gg$  site residence time ( $\sim 10$  s), thus each digestion event reaches completion, and site occupancy determines digestion occurrence. 2) A substrate prefers taking an empty catalytic site to competing for an occupied one. 3) Only up to one site per substrate can get bound and cleaved per event; each cleavage generates two different peptides, which can serve as substrates for the next digestion. 4) All starting and intermediate substrates can be treated equal. 5) Flow and DDM facilitation minimizes effects of slow substrate/product diffusion.

Abundance refers to the number of molecules, or concentration in molarity.

H, high-abundance species;  $H_{prot}$ , amount of original protein;  $H_{pept}$ , amount of peptide products.

L, low-abundance species;  $L_{prot}$ , amount of original protein;  $L_{pept}$ , amount of peptide products.

S (a) the total accessible substrates (original protein or intermediate peptide substrates) before a given digestion event:  $S_H$ , for a high-abundance species (H);  $S_L$ , for a low-abundance species (L).

b, the total number of effective catalytic sites on enzymes in a given digestion event.

n, theoretical number of digestion events,  $n=1, 2, 3, \dots, n_{last}$ , and n controls peptide product length

by  $aa_{pept} = \frac{aa_{prot}}{2^n}$ .

$n_e, n_{equal}$ , the digestion event when  $S(a) = b$ .

t, the transmission efficiency from substrate to peptide (S-P) harboring a given residue in a digestion event.

Type I bias is defined as  $\frac{\sum H_{pept}}{\sum L_{pept}} \neq \frac{H_{prot}}{L_{prot}}$ , no-bias is defined as  $\frac{\sum H_{pept}}{\sum L_{pept}} = \frac{H_{prot}}{L_{prot}}$ .

Type II bias for a given peptide form (i) is defined as  $\frac{H_{\text{pept}}^i}{H_{\text{prot}}} \neq \frac{L_{\text{pept}}^i}{L_{\text{prot}}}$ , no-bias is defined as

$$\frac{H_{\text{pept}}^i}{H_{\text{prot}}} = \frac{L_{\text{pept}}^i}{L_{\text{prot}}}.$$

**1) When  $a \leq b$  ( $n \leq n_e$ ),** digestion is not limited by b, and each substrate molecule has a 100% chance to occupy an available catalytic site to complete the digestion event.

After n digestion events, the total numbers of peptide products for H and L species are,

$$\sum H_{\text{pept}} = H_{\text{prot}} (2 \times 100\%)^n = H_{\text{prot}} 2^n \quad (1)$$

$$\sum L_{\text{pept}} = L_{\text{prot}} (2 \times 100\%)^n = L_{\text{prot}} 2^n \quad (2)$$

Peptide product abundance ratio  $\frac{\sum H_{\text{pept}}}{\sum L_{\text{pept}}}$  is,

$$\frac{\sum H_{\text{pept}}}{\sum L_{\text{pept}}} = \frac{H_{\text{prot}} 2^n}{L_{\text{prot}} 2^n} = \frac{H_{\text{prot}}}{L_{\text{prot}}} \quad (3)$$

Thus there is no type I bias over abundance.

After n digestion events, for a given n-level i-peptide in the products, each preceding intermediate was generated at 100% transmission efficiency, thus each one starting protein generates one copy of i-peptide, regardless of H or L.

$$H_{\text{pept}}^i = H_{\text{prot}} \times 100\%^n = H_{\text{prot}} \quad (4)$$

$$\frac{H_{\text{pept}}^i}{H_{\text{prot}}} = 1$$

$$\text{Likewise, } L_{\text{pept}}^i = L_{\text{prot}} \times 100\%^n = L_{\text{prot}} \quad (5)$$

$$\frac{H_{\text{pept}}^i}{H_{\text{prot}}} = \frac{L_{\text{pept}}^i}{L_{\text{prot}}} = 1,$$

Therefore, there is no type II bias over abundance.

$$\text{Upon completion of } n_e, H_{\text{prot}} 2^{n_e} + L_{\text{prot}} 2^{n_e} = b \quad (6)$$

**2) When  $a > b$  ( $n > n_e$ ),** digestion is limited by  $b$ —the total number of substrates that can get cleaved by digestion event  $n$  is only  $b$ . The chance for a species' substrates to occupy catalytic sites is less than 100%, but is proportional to its fraction in the total substrate abundance.

Prior to digestion  $n_{e+1}$ , substrates are  $n_e$  peptides with uniform length.

Total H or L substrates are:  $\sum S_{H(n_{e+1})} = 2^{n_e} H_{prot}$ ,  $\sum S_{L(n_{e+1})} = 2^{n_e} L_{prot}$

Total of all substrates is  $\sum S_{n_{e+1}} = 2^{n_e} H_{prot} + 2^{n_e} L_{prot}$  (7)

After digestion event  $n_{e+1}$ ,  $b$  substrates are consumed, and  $2b$  new products are formed. The distribution of these new products between H and L species is,

$$\frac{2b \sum S_{H(n_{e+1})}}{\sum S_{n_{e+1}}} = \frac{2b 2^{n_e} H_{prot}}{2^{n_e} (H_{prot} + L_{prot})} = \frac{2b H_{prot}}{H_{prot} + L_{prot}} \quad (8)$$

$$\frac{2b \sum S_{L(n_{e+1})}}{\sum S_{n_{e+1}}} = \frac{2b 2^{n_e} L_{prot}}{2^{n_e} (H_{prot} + L_{prot})} = \frac{2b L_{prot}}{H_{prot} + L_{prot}} \quad (9)$$

The total peptide products after digestion  $n_{e+1}$ , now containing mixed peptide lengths, are also the total substrates prior to the next  $n_{e+2}$  digestion,

$$\sum H_{pept} = 2^{n_e} H_{prot} + \frac{b H_{prot}}{H_{prot} + L_{prot}} = \frac{H_{prot}}{H_{prot} + L_{prot}} (2^{n_e} H_{prot} + 2^{n_e} L_{prot} + b) = \sum S_{H(n_{e+2})} \quad (10)$$

$$\sum L_{pept} = 2^{n_e} L_{prot} + \frac{b L_{prot}}{H_{prot} + L_{prot}} = \frac{L_{prot}}{H_{prot} + L_{prot}} (2^{n_e} H_{prot} + 2^{n_e} L_{prot} + b) = \sum S_{L(n_{e+2})} \quad (11)$$

$$\sum H_{pept} + \sum L_{pept} = 2^{n_e} H_{prot} + 2^{n_e} L_{prot} + b = \sum S_{n_{e+2}} \quad (12)$$

The abundance ratio of total H or L peptide products is therefore,

$$\frac{\sum H_{pept}}{\sum L_{pept}} = \frac{2^{n_e} H_{prot} + \frac{b H_{prot}}{H_{prot} + L_{prot}}}{2^{n_e} L_{prot} + \frac{b L_{prot}}{H_{prot} + L_{prot}}} = \frac{H_{prot}}{L_{prot}}, \text{ thus no type I bias.}$$

The amount of  $(n_{e+1})$ -level peptides bearing site  $i$  is,

$$H_{pept}^i = (H_{prot} \times 100\%^{n_e}) \times \frac{b}{\sum H_{pept} + \sum L_{pept}} = \frac{b H_{prot}}{2^{n_e} H_{prot} + 2^{n_e} L_{prot} + b} \quad (13)$$

$$L_{\text{pept}}^i = \frac{bL_{\text{prot}}}{2^{n_e}H_{\text{prot}} + 2^{n_e}L_{\text{prot}} + b} \quad (14)$$

Thus the abundance ratio of i-peptide to its original protein, after applying eq (6), is,

$$\frac{H_{\text{pept}}^i}{H_{\text{prot}}} = \frac{\frac{bH_{\text{prot}}}{2^{n_e}H_{\text{prot}} + 2^{n_e}L_{\text{prot}} + b}}{H_{\text{prot}}} = \frac{b}{2^{n_e}H_{\text{prot}} + 2^{n_e}L_{\text{prot}} + b} = \frac{1}{2} \quad (15)$$

$$\frac{L_{\text{pept}}^i}{L_{\text{prot}}} = \frac{\frac{bL_{\text{prot}}}{2^{n_e}H_{\text{prot}} + 2^{n_e}L_{\text{prot}} + b}}{L_{\text{prot}}} = \frac{1}{2} \quad (16)$$

Thus  $\frac{H_{\text{pept}}^i}{H_{\text{prot}}} = \frac{L_{\text{pept}}^i}{L_{\text{prot}}} = \frac{1}{2}$ , no type II bias when  $n = n_e + 1$ .

This means that after  $n_e + 1$ , the abundance of i-peptide with aimed length starts to under-represent its original protein abundance by a factor of 50%, regardless of protein relative abundance. Nonetheless, peptide-centric relative quantitation of a protein between cell states is not skewed by protein's abundance change.

Likewise, products can be calculated for digestion event  $n_e + 2$ .

Before  $n_e + 2$ , total substrates (containing mixed peptide lengths) are shown by eq (12),

$$\sum S_{n_e+2} = 2^{n_e}H_{\text{prot}} + 2^{n_e}L_{\text{prot}} + b$$

After digestion event  $n_e + 2$ ,  $b$  substrates are consumed, and  $2b$  new products are formed. The distribution of these new products among H and L species is,

$$\frac{2b \sum S_{H(n_e+2)}}{\sum S_{n_e+2}} = 2b \frac{\frac{H_{\text{prot}}}{H_{\text{prot}} + L_{\text{prot}}}(2^{n_e}H_{\text{prot}} + 2^{n_e}L_{\text{prot}} + b)}{2^{n_e}H_{\text{prot}} + 2^{n_e}L_{\text{prot}} + b} = \frac{2bH_{\text{prot}}}{H_{\text{prot}} + L_{\text{prot}}} \quad (17)$$

$$\frac{2b \sum S_{L(n_e+2)}}{\sum S_{n_e+2}} = 2b \frac{\frac{L_{\text{prot}}}{H_{\text{prot}} + L_{\text{prot}}}(2^{n_e}H_{\text{prot}} + 2^{n_e}L_{\text{prot}} + b)}{2^{n_e}H_{\text{prot}} + 2^{n_e}L_{\text{prot}} + b} = \frac{2bL_{\text{prot}}}{H_{\text{prot}} + L_{\text{prot}}} \quad (18)$$

$$\begin{aligned} \sum H_{\text{pept}} &= \frac{H_{\text{prot}}}{H_{\text{prot}} + L_{\text{prot}}} (2^{n_e}H_{\text{prot}} + 2^{n_e}L_{\text{prot}} + b) + \frac{bH_{\text{prot}}}{H_{\text{prot}} + L_{\text{prot}}} \\ &= \frac{H_{\text{prot}}}{H_{\text{prot}} + L_{\text{prot}}} (2^{n_e}H_{\text{prot}} + 2^{n_e}L_{\text{prot}} + 2b) = \sum S_{H(n_e+3)} \end{aligned} \quad (19)$$

$$\begin{aligned}\sum L_{\text{pept}} &= \frac{L_{\text{prot}}}{H_{\text{prot}}+L_{\text{prot}}} (2^{n_e}H_{\text{prot}} + 2^{n_e}L_{\text{prot}} + b) + \frac{bL_{\text{prot}}}{H_{\text{prot}}+L_{\text{prot}}} \\ &= \frac{L_{\text{prot}}}{H_{\text{prot}}+L_{\text{prot}}} (2^{n_e}H_{\text{prot}} + 2^{n_e}L_{\text{prot}} + 2b) = \sum S_{L(n_e+3)}\end{aligned}\quad (20)$$

$$\sum H_{\text{pept}} + \sum L_{\text{pept}} = 2^{n_e}H_{\text{prot}} + 2^{n_e}L_{\text{prot}} + 2b = \sum S_{n_e+3}\quad (21)$$

The abundance ratio of total H or L peptide products is therefore,

$$\frac{\sum H_{\text{pept}}}{\sum L_{\text{pept}}} = \frac{\frac{H_{\text{prot}}}{H_{\text{prot}}+L_{\text{prot}}}(2^{n_e}H_{\text{prot}}+2^{n_e}L_{\text{prot}}+2b)}{\frac{L_{\text{prot}}}{H_{\text{prot}}+L_{\text{prot}}}(2^{n_e}H_{\text{prot}}+2^{n_e}L_{\text{prot}}+2b)} = \frac{H_{\text{prot}}}{L_{\text{prot}}}, \text{ thus no type I bias.}$$

The amount of  $(n_e+2)$ -level i-peptide is,

$$H_{\text{pept}}^i = \frac{bH_{\text{prot}}}{2^{n_e}H_{\text{prot}}+2^{n_e}L_{\text{prot}}+b} \times \frac{b}{2^{n_e}H_{\text{prot}}+2^{n_e}L_{\text{prot}}+2b}\quad (22)$$

$$L_{\text{pept}}^i = \frac{bL_{\text{prot}}}{2^{n_e}H_{\text{prot}}+2^{n_e}L_{\text{prot}}+b} \times \frac{b}{2^{n_e}H_{\text{prot}}+2^{n_e}L_{\text{prot}}+2b}\quad (23)$$

Thus the abundance ratio of peptide i to its original protein, after applying eq (6), is,

$$\frac{H_{\text{pept}}^i}{H_{\text{prot}}} = \frac{b}{2^{n_e}H_{\text{prot}}+2^{n_e}L_{\text{prot}}+b} \times \frac{b}{2^{n_e}H_{\text{prot}}+2^{n_e}L_{\text{prot}}+2b} = \frac{1}{2} \times \frac{1}{3} = \frac{1}{6}\quad (24)$$

$$\frac{L_{\text{pept}}^i}{L_{\text{prot}}} = \frac{b}{2^{n_e}H_{\text{prot}}+2^{n_e}L_{\text{prot}}+b} \times \frac{b}{2^{n_e}H_{\text{prot}}+2^{n_e}L_{\text{prot}}+2b} = \frac{1}{6}\quad (25)$$

Thus  $\frac{H_{\text{pept}}^i}{H_{\text{prot}}} = \frac{L_{\text{pept}}^i}{L_{\text{prot}}} = \frac{1}{6}$ , no type II bias between H and L when  $n = n_e+2$ , despite under-

representation of protein abundance by peptide within individual H or L species.

In summary, after  $n$  digestion events,

$$\text{For type I bias, } \frac{\sum H_{\text{pept}}}{\sum L_{\text{pept}}} = \frac{H_{\text{prot}}}{L_{\text{prot}}}\quad (26)$$

For type II bias,

When  $n \leq n_e$  ( $a \leq b$ ),

$$\frac{H_{\text{pept}}^i}{H_{\text{prot}}} = \frac{L_{\text{pept}}^i}{L_{\text{prot}}} = 1^n = 1$$



When  $n > n_e$  ( $a > b$ ),

$$\frac{H_{\text{pept}}^i}{H_{\text{prot}}} = \frac{L_{\text{pept}}^i}{L_{\text{prot}}} = 1^{n_e} \prod_{j=1}^{n-n_e} \frac{b}{2^{n_e} H_{\text{prot}} + 2^{n_e} L_{\text{prot}} + j b} = \prod_{j=1}^{n-n_e} \frac{1}{j+1} < 1$$

$$\text{Thus for type II bias, } \frac{H_{\text{pept}}^i}{H_{\text{prot}}} = \frac{L_{\text{pept}}^i}{L_{\text{prot}}} = \begin{cases} 1 & n \leq n_e \text{ (} a \leq b \text{)} \\ \prod_{j=1}^{n-n_e} \frac{1}{j+1} & n > n_e \text{ (} a > b \text{)} \end{cases} \quad (27)$$

In conclusion, pepsin column doesn't incur type I or type II abundance-biases throughout the protein processing, according to this digestion model assuming fast completion of reactions.

But peptide reproducibility and the proportion of peptides with useful/target length start to deteriorate and propagate rapidly after total substrates exceed catalytic sites ( $n > n_e$ ,  $a > b$ ).

Thus operating digestion within the  $n \leq n_e$  region is desirable. The ratio of total protein amount—but not fractions for individual species—over total catalytic sites, determines whether a digestion experiment incurs low efficiency. Therefore, an optimal digestion method should provide effective catalytic sites that far exceed protein concentration, so that sufficient number of digestion events can occur before exceeding the  $n_e$  boundary.

#### *Determination of $n_e$*

We defined  $n_e$  as the theoretical digestion event number upon which  $a = b$ , the total of accessible substrate cleavage sites ( $a$ ) equals that of effective catalytic sites available ( $b$ ).  $n_e$  can be applied as an evaluation parameter for pepsin column operation. Upon the completion of  $n_e$  ( $a \leq b$ ), the total number of substrates has increased exponentially after each event for each species, therefore

$$a = 2^{n_e} H_{\text{prot}} + 2^{n_e} L_{\text{prot}} = 2^{n_e} (H_{\text{prot}} + L_{\text{prot}}) = b$$

$$n_e = \ln \frac{b}{H_{\text{prot}} + L_{\text{prot}}} / \ln 2 = \ln \frac{\text{pepsin effective surface concentration}}{\text{total starting protein concentration}} / 0.693 \quad (28)$$

Thus  $n_e$  is unaffected by protein relative abundance, but can be controlled by adjusting the total protein concentration in samples—through dilution. In a pepsin column with effective surface concentration at over 1 mM, for a 1  $\mu$ M protein solution,

$$n_e = \ln \frac{1000 \mu\text{M}}{1 \mu\text{M}} / 0.693 = 6.91 / 0.693 = 10$$

To determine how many theoretical digestion events are needed to obtain desired peptide length, we assumed each digestion cuts at the mid-point of a substrate: if a protein length is  $aa_{prot}$ , after  $m$  digestion events, the product peptide length  $aa_{pept}$  is,

$$aa_{pept} = \frac{aa_{prot}}{2^m}$$

Thus  $m$  can be determined by  $m = \ln \frac{aa_{prot}}{aa_{pept}} / 0.693$  (29)

For a 600-residue protein, to obtain peptides 10-residue long, the number of digestion events needed is,

$$m = \ln \frac{aa_{prot}}{aa_{pept}} / 0.693 = \ln \frac{600}{10} / 0.693 = 5.9 < n_e$$

Therefore  $n_e$  far exceeds the number of digestions needed to get desired peptide length for most proteins, allowing pepsin column to operate well within the ideal  $n < n_e$  region throughout protein processing.

### *Considering reaction kinetics*

We then analyzed reaction kinetics by combining models of competitive-substrate Langmuir adsorption and classical enzymatic reaction, for each digestion event. We considered two protein species, H and L, that compete for digestion at surface catalytic sites (\*). Given the fast diffusion of substrates and products in the plug-flow pepsin reactor, we assumed steady-state approximation in the reaction: fast equilibrium of adsorption and desorption,  $k_a, k_d \gg k_{cat}$ , thus

surface concentration of ES rapidly reaches a steady level. Reaction rate constant  $k_{cat}$  includes both bond cleavage and product dissociation from the surface site. This model suggests that Type I abundance bias is not a concern, but pepsin preference can cause site/domain-bias in the rate to complete reactions.

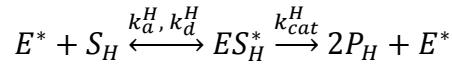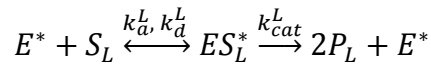

$$k_a, k_d \gg k_{cat}, \text{ for both H and L}$$

The total of surface coverage ( $\Gamma$ ) for free, H and L substrate-occupied catalytic sites is constant

b. The fraction occupancy of each species is represented by  $\theta$ :  $\theta_E = \Gamma_{E^*}/b$ , and  $\theta_{ES} = \Gamma_{ES^*}/b$ .

$$\Gamma_{E^*} + \Gamma_{ES_H^*} + \Gamma_{ES_L^*} = b \quad (1)$$

$$\theta_E + \theta_{ES}^H + \theta_{ES}^L = 1 \quad (2)$$

By steady-state approximation,

$$\frac{d\theta_{ES}^H}{dt} = 0 \text{ and } \frac{d\theta_{ES}^L}{dt} = 0$$

$$\frac{d\theta_{ES}^H}{dt} = k_a^H \theta_E [S_H] - k_d^H \theta_{ES}^H - k_{cat}^H \theta_{ES}^H = 0 \quad (3)$$

$$\frac{d\theta_{ES}^L}{dt} = k_a^L \theta_E [S_L] - k_d^L \theta_{ES}^L - k_{cat}^L \theta_{ES}^L = 0 \quad (4)$$

Solving eq (2)-(4) for  $\theta_E$  leads to,

$$\theta_E = \frac{1}{1 + \frac{k_a^H [S_H]}{k_d^H + k_{cat}^H} + \frac{k_a^L [S_L]}{k_d^L + k_{cat}^L}} = \frac{1}{1 + \frac{[S_H]}{K_M^H} + \frac{[S_L]}{K_M^L}} = \frac{K_M^H K_M^L}{K_M^H K_M^L + K_M^L [S_H] + K_M^H [S_L]} \quad (5)$$

Where  $K_M^H$  and  $K_M^L$  are defined as,

$$K_M^H = \frac{k_d^H + k_{cat}^H}{k_a^H}, \quad K_M^L = \frac{k_d^L + k_{cat}^L}{k_a^L} \quad (6)$$

Eq (3)-(5) lead to,

$$\theta_{ES}^H = \frac{\theta_E[S_H]}{K_M^H} = \frac{K_M^L[S_H]}{K_M^H K_M^L + K_M^L[S_H] + K_M^H[S_L]} \quad (7)$$

$$\theta_{ES}^L = \frac{\theta_E[S_L]}{K_M^L} = \frac{K_M^H[S_L]}{K_M^H K_M^L + K_M^L[S_H] + K_M^H[S_L]} \quad (8)$$

Product generation rates for H and L species are,

$$\frac{dP_H}{dt} = 2k_{cat}^H(\theta_{ES}^H b) = \frac{2bk_{cat}^H K_M^L[S_H]}{K_M^H K_M^L + K_M^L[S_H] + K_M^H[S_L]} \quad (9)$$

$$\frac{dP_L}{dt} = 2k_{cat}^L(\theta_{ES}^L b) = \frac{2bk_{cat}^L K_M^H[S_L]}{K_M^H K_M^L + K_M^L[S_H] + K_M^H[S_L]} \quad (10)$$

Therefore,

$$\frac{\frac{dP_H}{dt}}{\frac{dP_L}{dt}} = \frac{k_{cat}^H K_M^L[S_H]}{k_{cat}^L K_M^H[S_L]} = \frac{[S_H]}{[S_L]} \left( \frac{k_{cat}^H K_M^L}{k_{cat}^L K_M^H} \right) = \frac{[S_H]}{[S_L]} \left( \frac{\frac{k_{cat}^H}{K_M^H}}{\frac{k_{cat}^L}{K_M^L}} \right) \quad (11)$$

We define  $\frac{k_{cat}^H}{K_M^H} / \frac{k_{cat}^L}{K_M^L}$  as the site-bias factor.

When  $\frac{k_{cat}}{K_M}$  is the same for H and L species,

$$\frac{\frac{dP_H}{dt}}{\frac{dP_L}{dt}} = \frac{[S_H]}{[S_L]}, \quad \text{thus peptide generation doesn't suffer type I bias, even considering kinetics.}$$

But  $\frac{k_{cat}}{K_M}$  more likely differ with residues' protease preference, than with protein abundance,

thus eq (11) may also explain domain-bias within the same protein for pepsin: peptides from accessible higher-preference residues (such as FWLMC (39)) will get generated faster in the digestion events.

### *Implications for digestion methods*

Immobilizing pepsin on POROS bead surface enhances pepsin effective surface concentration to over-mM scale (33), able to reach over thousands fold higher than the 1  $\mu$ M concentration of

total protein applied herein. This allows the pepsin column to operate within the abundance-unbiased high-efficiency region ( $a \leq b$ ) for multiple digestion events. Unrestricted by sample size, as the flow instantly removes products from catalytic sites preventing inhibition, pepsin column digestion can process large amounts of protein sample—in the optimal region by diluting to sub-1  $\mu\text{M}$ , and reproducibly form peptides between states where protein relative abundances may vary. Considering reaction kinetics, the theoretical number of digestion events (peptide length) can be controlled by flow rate, size and temperature of pepsin column, to obtain optimal peptide products.

By contrast, traditional in-solution trypsin digestion demands low concentration ratio of protease : protein substrate (such as 1 : 50, m/m) to reduce product contamination by protease, thereby placing the near-entire digestion in the low-efficiency region ( $a \gg b$ ), until substrate sites approach exhaustion (such as below 2% of starting substrates) which requires longer incubation time. Still, missed cleavages are routinely observed. Digestion efficiency is further compromised by partial trypsin deactivation from the frequently applied 2 M urea. Furthermore, substrate and product diffusion to/from the catalytic site, though often excluded by kinetic models, is slow during gentle agitation, and unpredictably decreases catalytic sites available. Thus traditional urea-trypsin in-solution digestion methods suffer low efficiency caused by intrinsic catalytic site-deficiency and slow diffusion—which FDD overcomes.
